# Supplementary material for: Neuronal network activity and connectivity are impaired in a conditional knockout mouse model with PCDH19 mosaic expression
Source: Springer Nature journal article supplement (doi:10.1038/s41380-023-02022-1), 2023-03-30
Supplement: MOESM1 [file 41380_2023_2022_MOESM1_ESM.pdf]

## SUPPLEMENTARY METHODS

### ***Pcdh19* floxed mice**

*Pcdh19* floxed mice were generated at InGenious Targeting Laboratories, Inc. (USA) by inserting two loxP sites located 174 bp upstream and 225 bp downstream of exon 3, respectively. To this end, a targeting vector was constructed by using a fosmid clone. The targeting vector (15.4 kb) was composed by: 5' homology arm (6.8 kb), loxP site, the target region containing exon 3 (target region, 727 bp), loxP/FRT flanked Neomycin (Neo) selection cassette (2808 bp), 3' homology arm (5.1 kb). The targeting construct was subcloned from the fosmid and purified prior to electroporation into iTL BF1 (C57BL/6 FLP) embryonic stem (ES) cells, which express FLP recombinase vector to remove the selection cassette. Correctly targeted ES cells were microinjected into Balb/c blastocysts. Resulting chimeras were mated to C57BL/6 WT mice to generate germline Neo deleted mice.

### **ICV injection of AAVs**

*Pcdh19* floxed pups (P0) were anesthetized via cryo-anaesthesia and their head was disinfected with 70% ethanol. Sterilized glass micropipettes were prepared with a puller (Sutter Instrument, USA) and attached to a 3ml syringe through a silicon tube. Micropipettes loaded with the AAVs were inserted 2-3 mm deep into the skull of the anesthetized pups in order to reach the ventricles (0.25 mm lateral to the sagittal suture and 0.50-0.75 mm rostral to the neonatal coronary suture). 1  $\mu$ l of AAV solution containing  $5.5 \times 10^9$  GFP-Cre AAV9 particles (AAV9.hSyn.HI.eGFP-Cre.WPRE.SV40, Penn Vector, USA) (Fig. 3; Supplementary Fig. 1) or  $3.4 \times 10^9$  GFP-2A-Cre AAV9 particles (AAV9-hSYN1-eGFP-2A-iCre-WPRE, Vector Biolabs) (Supplementary Fig. 4), 0.05% w/v trypan blue, and sterile PBS (mM: 137 NaCl, 2.7 KCl, 8 Na<sub>2</sub>HPO<sub>4</sub> x 2H<sub>2</sub>O, 2.3 NaH<sub>2</sub>PO<sub>4</sub>, pH 7.4) was slowly injected in each ventricle. The micropipette stayed in position for 15 sec to prevent backflow. Pups were placed under a warming light until full recovery and finally returned to their home cage with the mother.

## Behavioral tests

Adult (> P90) female mice, *Pcdh19* cKO (*Pcdh19<sup>fl/x</sup>* Syn1-Cre) and control littermates (*Pcdh19<sup>fl/x</sup>*), were used for behavioral experiments.

*Spontaneous motor activity*: Mice locomotion was evaluated by recording animals in an automated activity cage (43 x 43 x 32 cm) (Ugo Basile). Beam breaks were counted for 30 min to extrapolate horizontal and vertical movements.

*Self-grooming*: Mice were habituated to a transparent cylinder (46 x 23.5 x 20 cm) for 10 min and self-grooming events in the following 10 min were recorded and analyzed manually.

*Novel object recognition*: After 10 min of habituation in the test cage, two different objects were placed at the center of the cage and mice were free to explore them for 20 min (familiarization phase) before returning to their home cage. After 5 min, 120 min, and 24 hours mice returned to the test cage, in which one of the two familiar objects had been replaced by a novel one, for 20 min (recognition phase). The discrimination index (I) was calculated as the difference between the exploration time of the novel object (N) and the exploration time of the familiar one (F) on the total time of exploration:  $I = (N - F) / (N + F)$ . Exploration was achieved when mice stayed within 0.5 cm from the object with the nose toward the object.

*Morris water maze*: The Morris water maze test was performed in a circular pool (154 cm in diameter x 38 cm in height). A circular hidden platform with a diameter of 13.5 cm was inside the pool, 0.5 cm below the surface of the water. The swimming pool was filled with water at a constant temperature ( $22^{\circ}\text{C} \pm 2^{\circ}\text{C}$ ) and made opaque with the addition of non-toxic white tempera paint to hide the platform. First, mice were habituated to the water maze (60 sec) and to the platform (60 sec). Next, in the acquisition phase, mice performed 4 trials/day (with 1 hour inter-trial interval) for 4 consecutive days: each mouse was placed in the pool with the platform in a fixed position, but changing the mouse starting position on each trial. Mice unable to find the platform within 60 sec (cut-off) were guided to the platform and remained on it for 60 sec. The 5<sup>th</sup> day the probe test (duration, 60 sec) was performed, in which the platform was removed. Finally, in the reversal phase, starting 2 days after

the probe test, mice performed 4 trials/day (trial cut-off, 60 sec; 1 hour inter-trial interval) for 4 consecutive days: each mouse was placed in the pool, in which the platform had been moved to the opposite quadrant, changing the mouse starting position on each trial. The 5<sup>th</sup> day, a second probe test (duration, 60 sec) was performed, in which the platform was removed. To assess visual acuity, mice performed a single-trial test in which the platform was moved to a different quadrant and made visible by a flag on top. After each trial, mice were placed on a paper towel for drying and then put back into their home cages. Mice were recorded during each trial and latency to reach the platform was analyzed through Ethovision XT software (Noldus Information Technology).

*Fear conditioning:* The fear conditioning apparatus (26 x 26 x 27 cm) consisted in a ventilated and sound-attenuated chamber connected to a PC (Panlab Harvard Apparatus). The chamber was provided with a floor composed by 19 steel rods through which a scrambled shock can be delivered, black stainless steel sidewalls and a Plexiglas door. The day of conditioning (Day 1), each mouse, after 2 min of exploration, received 5 consecutive tone-shock pairings at 30 sec inter-trial intervals. The 85-dB tone (conditioned stimulus, CS) lasts 28 sec and was followed by a 0.5 mA shock (unconditioned stimulus, US) for 2 sec. Acetic acid (5%) was used for cleaning in between training sessions. 24 h after (Day 2, context test) mice were re-exposed to the same chamber for 5 min without receiving any stimulus. 24 h later (Day 3, cued test) mice were habituated for 2 min to a different context, i.e. a cylinder with a smooth floor cleaned with ethanol 4%, to provide a different odor. Subsequently, they received 3 tone-shock pairings. Stimuli delivery, data acquisition and analysis were performed automatically using Packwin software (Panlab Harvard Apparatus). The percentage of freezing during sessions was evaluated and was defined as percentage of time the animal was immobile except for breathing.

### **Preparation of Prime MEA chips with cultured mouse neurons**

The external surface of Prime HD-MEA system chips (3Brain, Switzerland) was cleaned with ethanol, and chips were placed into a sterile 10 cm-diameter Petri dish (Corning). Chips plating area was then filled with 70% ethanol for 20 min, rinsed 2-3 times with sterile double-distilled water (DDW), and dried under a laminar hood. Afterwards, chips were coated with a drop of laminin (0.1 mg/ml in DDW; Sigma Aldrich) mixed with a drop of poly-d-lysine (0.1 mg/ml in borate buffer: 100 mM boric acid, 25 mM sodium tetraborate, pH 8.4; Sigma Aldrich), Petri dishes were sealed with parafilm to prevent evaporation, and Petri with chips were incubated overnight at 37 °C and 5% CO<sub>2</sub>. The next day, MEA chips were rinsed 4 times with sterile DDW and left to dry under the hood before cell seeding. Dissociated neurons (80 µl, 70000 neurons) were plated on the recording area of chips. After incubation (1h, 37 °C, 5% CO<sub>2</sub>), 1.5 mL of complete medium (Neurobasal A, Gibco) supplemented with 1% L-glutamine (Gibco), 4% B27 (Gibco), 1% Glucose, 1% Penicillin-Streptomycin (Gibco) was added. One-third of the medium was replaced with fresh medium twice a week, according to the manufacturer's instructions. Spontaneous extracellular activity of neurons cultured on HD-MEAs was recorded at DIV16-21. On the day of the recordings, MEA chips were moved out of the incubator. After acclimation of 10 min, spontaneous activity was monitored for 20-25 min at RT to allow activity stabilization and recorded during the following 5 min.

### **Preparation of Arena MEA chips with acute brain slices**

*Pcdh19* cKO mice (*Pcdh19*<sup>fl/x</sup> Syn1-Cre) and control littermates (*Pcdh19*<sup>fl/x</sup>) were sacrificed by cervical dislocation and their brain was rapidly removed and placed in an ice-cold cutting solution at pH 7.3, equilibrated with 95% O<sub>2</sub> and 5% CO<sub>2</sub> (cutting solution: mM, 220 sucrose, 2 KCl, 1.3 NaH<sub>2</sub>PO<sub>4</sub>, 12 MgSO<sub>4</sub>, 0.2 CaCl<sub>2</sub>, 10 glucose, 2.6 NaHCO<sub>3</sub>, 3 kynurenic acid). After removing cerebellum and prefrontal cortex, 400 µm-thick coronal brain slices containing the hippocampus (central region along the antero-posterior axis) were cut using a vibratome (Leica VT1000S). Slices

were incubated at 35°C for 40 min and then at RT for 1 hour in standard aCSF before recordings. Slices were transferred to Arena HD-MEA chips (3Brain, Switzerland).

A square-shaped platinum mesh anchor (custom-made by 3Brain) was placed over the slices to prevent displacement and to ensure uniform contact with the electrodes. Slices were perfused at a rate of ~4.5 mL/min with oxygenated aCSF at RT (22-24°C) for 10 min. Subsequently, Mg<sup>2+</sup>-free aCSF solution supplemented with 4-Aminopyridine (100 µM, Sigma Aldrich) was used in order to evoke epileptic-like activity. Recordings were performed at RT and slices were continuously perfused at a rate of 4.5 ml/min with aCSF.

### **Surgery for *in vivo* MEA implant**

After 3 days of acclimatization at animal facility, wireless MEAs were implanted in P34-37 mouse brains, in correspondence of limbic system core regions, i.e. the amygdala (Amy), the CA1 hippocampal region, the perirhinal cortex (PRC) and the entorhinal cortex (ERC). To prevent infections, tetracycline was administered with water (50 mg/500 ml) 2 days before the surgery and instruments, working areas, and the stereotaxic apparatus were sterilized. Stereotaxic coordinates were -3.0 mm anterior-posterior and 3.0 mm medial-lateral from bregma, which identify an area on the parietal and interparietal bones overlying the primary and secondary visual cortices. Mice were anesthetized by a gaseous mixture of oxygen (95%) and isoflurane (5%) in the induction chamber for few minutes. The level of anesthesia was checked by testing the mouse response to opportune sensory stimuli usually provoking limb retraction. After induction, anesthesia was maintained throughout the surgical procedure by continuously administering isoflurane through a face mask. The mouse head was shaved down to the level of the descending trapezium and the skin was disinfected. The mouse was placed on a sterilized surgical desk in prone position. The mouse skin was incised from the nasal bones to the occipital bone. The surgical incision was then enlarged over the skull vault. The periosteum was then accurately removed from the bone vault to clear the access to the frontal and parietal left bones. A sterile dressing soaked with physiological solution was placed on the

surgical field and fixed with surgical clips. The mouse, but the head, was then inserted within a plastic multi-perforated sack to avoid contaminations from fur and placed on a warmed surgical bed with temperature regulation at 37.5 °C within the frame of the stereotaxic apparatus. After fixing the mouse head to the apparatus, the bone surface was again cleaned and dried. If serous or bleeding sources were evident, they were dried out by pressing cotton blobs or burned by cauterization. Under surgical microscope control, a bone window for each hemisphere (mm<sup>2</sup>: 2x4, medial-lateral x anterior-posterior) was created to expose the meningeal dura mater surface. Bone powders springing off during the drilling procedure were conveniently removed by a pipette connected to a void-pump. One small pilot hole was made to aid for the insertion of a micro-screw (ground electrode). After, the cortical surface was maintained well hydrated and in correct osmotical environment by warmed aCSF. The microelectrodes matrix, previously cleaned by ethanol solution (70%) rinsing and then by immersion in sterile distilled water, was fixed to a sterile clamp mounted on a micro-stepper electronic motor (M228 Stepper-Mike Linear Actuators) on the stereotaxic frame. The motor was initially placed by manual control over the insertion area, in orthogonal position respect to the cortical surface, and slowly lowered toward the cortical surface. Next, the programmable motor was remotely controlled to guide the microelectrode matrix to touch the cortical surface. Finally, an electronically controlled descent step was made to reach the brain areas of interest (2-2.65 mm for PRC and CA1 electrodes, 4-5mm for Amy and ERC electrodes) and the electrode ground wire was fixed to the previously implanted micro-screw. The exposed cortical surface was gently covered with polyethylene glycol 4000, removing the excesses from the bone around. The whole surgical operation area was then covered by dental cement, molded around the plastic basis of the electrodes. The mouse was extracted from the protecting sack, removed from the stereotaxic frame and placed in its cage in a warm environment. Gentamycin was spread around the surgical region. Electrophysiological recordings started 3 days after the surgery (recovery period).

## SUPPLEMENTARY FIGURES LEGENDS

### **Supplementary Fig. 1 *Pcdh19* exon 3 excision by Cre recombinase prevents *Pcdh19* expression.**

**a** *Pcdh19* transcripts were assayed by RT-PCR with probes targeting upstream (exon, E 1-2) and downstream (E 4-5, E 5-6) regions of exon 3 in primary neurons prepared from P0 *Pcdh19* floxed mice (*Pcdh19<sup>fl/fl</sup>* and *Pcdh19<sup>fl/y</sup>*). Neurons were infected at DIV0 with GFP-Cre AAVs. Infected and uninfected (Ctrl) neurons were lysed at DIV10. *Pcdh19* mRNA expression was quantified by  $2^{-\Delta\Delta C_t}$  method and normalized on *actin* mRNA levels. Data are shown as means  $\pm$  SEM (N = 3; Student's t-test, \*\*  $p < 0.01$ , \*\*\*  $p < 0.001$ ). See also Supplementary Table 7.

**b** IF on primary neurons as in **a**. Neurons were stained at DIV7 with MAP2 and PCDH19. Scale bar, 20  $\mu$ m.

**c** Western blot on primary neurons as in **a**. Neurons were lysed at DIV10. GAPDH was used as loading control.

### **Supplementary Fig. 2 PCDH19 is expressed in both excitatory and inhibitory neurons and localizes at excitatory and inhibitory synapses.**

**a** Representative IF images of coronal cortical and hippocampal slices from a P23 *Pcdh19* floxed mouse (*Pcdh19<sup>fl/x</sup>*) stained for PCDH19, NeuN, GAD and DAPI, as indicated. The inserts show higher magnification images. Scale bars, 100  $\mu$ m.

**b** Representative IF images of primary neurons from P0 *Pcdh19* floxed mice (*Pcdh19<sup>fl/fl</sup>* and *Pcdh19<sup>fl/y</sup>*) (left) and colocalization analysis (right). Neurons were stained at DIV11 with PCDH19 and the markers of excitatory synapses VGLUT and PSD95. The fluorescence intensity profiles plot refers to the dendrite in the higher magnification images. Scale bars, 10  $\mu$ m.

Van Steensel's cross correlation function (Pearson's, R, as a function of pixelshift), R and Manders' coefficients (M1, fraction of PCDH19 overlapping with the indicated synaptic markers and M2,

fraction of each synaptic marker overlapping with PCDH19) are shown. N=13 neurons from 3 independent cultures.

**c** Representative IF images of primary neurons from mice as in **b** (left) and colocalization analysis (right). Neurons were stained at DIV11 with PCDH19 and the proteins of inhibitory synapses VGAT and GABA<sub>A</sub>R beta 3 subunit. The fluorescence intensity profiles plot refers to the dendrite in the higher magnification images. Scale bars, 10  $\mu$ m. Van Steensel's cross correlation function, R, and M1, M2 coefficients are shown. N=15 neurons from 3 independent cultures.

All data (**b**, **c**) are shown as means  $\pm$  SEM. See also Supplementary Table 8.

### **Supplementary Fig. 3 Genotyping strategy and expression of the *Pcdh19* floxed allele.**

**a** Schematic representation of PCR primers annealing on *Pcdh19* WT, floxed and cKO alleles and amplification products length (base pairs, bp: WT 1053, floxed 1224, cKO 379). E = exon.

**b** Representative results of PCR-based genotyping for *Pcdh19* WT, cKO female (*Pcdh19<sup>fl/x</sup>* Syn1-Cre) and cKO male (*Pcdh19<sup>fl/y</sup>* Syn1-Cre) mice, as indicated. Genomic DNA was extracted from the tail (left panel) or from the cortex (right panel). The *Pcdh19* floxed allele (1224 bp) is converted in the cKO allele (379 bp) selectivity in brain tissue.

**c** Representative Western blot and relative quantification showing PCDH19 protein expression in the hippocampus of three different groups of female mice: WT, heterozygous *Pcdh19* floxed mice (*Pcdh19<sup>fl/x</sup>*) and homozygous *Pcdh19* floxed mice (*Pcdh19<sup>fl/fl</sup>*). PCDH19 was normalized on GAPDH. Data are shown as means  $\pm$  SEM (N mice = 5/genotype; one-way ANOVA, n.s.). See also Supplementary Table 9.

### **Supplementary Fig. 4 Analysis of synapse ultrastructure in *Pcdh19* mosaic mice obtained by Cre AAV injection**

**a** Representative Western blots and relative quantification of PCDH19 expression in the hippocampus of > P90 *Pcdh19* mosaic mice obtained via GFP-2A-Cre AAVs injection of *Pcdh19* floxed mice



(*Pcdh19<sup>fl/fl</sup>* and *Pcdh19<sup>fl/y</sup>*) (Mosaic) and uninjected WT (Ctrl) mice. PCDH19 expression was normalized on tubulin (N, Ctrl 3, Mosaic 3; Student's t-test, \*  $p < 0.05$ ).

**b** Representative electron micrographs of excitatory synapses on apical dendrites of hippocampal CA1 pyramidal neurons from P50 mice as in **a** (top panel; scale bar, 200 nm)

**c** Quantification of synapse density and structural features from neurons as in **b** (N mice, Ctrl 3, Mosaic 2; N synapses > 100/genotype. Synapse density was evaluated on 369.0  $\mu\text{m}^2$  (Ctrl) and 328.0  $\mu\text{m}^2$  (Mosaic). Mann-Whitney test or Student's t-test, \*  $p < 0.05$ , \*\*\*  $p < 0.001$ , see Supplementary Table 10).

**d** PSD thickness and vesicle density distribution in excitatory synapses as in **b** (N mice, Ctrl 3, Mosaic 2).

All data (**a**, **c**) are shown as means  $\pm$  SEM. See also Supplementary Table 10.

**Supplementary Fig. 5 Hippocampal slices from *Pcdh19* mosaic mice at P8-10 and P60-90 display altered network activity.**

**a** Top left panel, representative images of MEA activity maps in pseudocolors, showing firing activity of hippocampal slices from *Pcdh19* mosaic mice (*Pcdh19<sup>fl/x</sup>* Syn1-Cre, Mosaic) and controls (*Pcdh19<sup>fl/x</sup>*, Ctrl) at P8-10. Top middle panel, representative raster plots showing electrophysiological activity recorded from 100 active channels over 5 min in Ctrl and Mosaic mice. Top right panel, representative traces recorded from a single electrode over 5 min in Ctrl and Mosaic mice. Bottom panels, quantification of MFR (total and by area: CA1, CA3, DG), MBR, MBD, PSB, and SI in Ctrl and Mosaic mice (N slices, Ctrl 8, Mosaic 6, from 6 Ctrl and 3 Mosaic mice; Student's t-test, \*  $p < 0.05$ , \*\*\*  $p < 0.001$ ).

**b** Panels as in **a**, showing data from *Pcdh19* mosaic mice (*Pcdh19<sup>fl/x</sup>* Syn1-Cre, Mosaic) and controls (*Pcdh19<sup>fl/x</sup>*, Ctrl) at P60-90 (N slices, Ctrl 5, Mosaic 5, from 3 mice/genotype; Student's t-test, \*  $p < 0.05$ , \*\*  $p < 0.01$ ).

All data (**a-b**) are shown as means  $\pm$  SEM. See also Supplementary Table 11.

**Supplementary Fig. 6 Stereotactic coordinates of the extracellular microelectrodes for *in vivo* recordings.**

Top and middle panels, coronal views of the two bilateral recording sites along the anteroposterior axis. Colored vertical bars superimposed on mouse coronal sections drawings [1] indicate groups of microelectrodes targeting brain regions of interests. 4 microelectrodes were positioned in amygdala (Amy), CA1 and entorhinal cortex (ERC), and 3 microelectrodes were positioned in perirhinal cortex (PRC). Bottom panel, length and spacing of the 15 microelectrodes that compose one of the two rows (one for each hemisphere) of the recording matrix (MicroProbes, Gaithersburg, US) connected to the headstage (Omnetics, Minneapolis, US). A, anterior; P, posterior.

**Supplementary Fig. 7 *Pcdh19* cKO male mice display mosaic expression of PCDH19.**

**a** Quantification of *Pcdh19* expression in cerebral cortex and in hippocampus from adult (P90) *Pcdh19* cKO male mice (*Pcdh19<sup>fl/y</sup>* Syn1-Cre, Mosaic) compared to sex-matched control littermates (*Pcdh19<sup>fl/y</sup>*, Ctrl). *Pcdh19* mRNA expression was normalized on *actin* mRNA levels (Cortex: N, Ctrl 4, Mosaic 3; Hippocampus: N, Ctrl 5, Mosaic 3; Student's t-test, \*  $p < 0.05$ , \*\*  $p < 0.01$ ).

**b** Representative Western blots and relative quantification of PCDH19 expression in cortex and hippocampus from adult (P90-120) male mice as in **a**. PCDH19 expression was normalized on GAPDH (Cortex: N, Ctrl 8, Mosaic 9; Hippocampus: N, Ctrl 6, Mosaic 7; Student's t-test, \*\*\*  $p < 0.001$ ).

**c** Representative IF images of coronal cortical slices from P30 mice as in **a** stained for PCDH19 and DAPI. The inserts show higher magnification images; arrows indicate representative couples of PCDH19-positive (yellow arrows) and -negative (white arrows) neurons. Scale bar, 100  $\mu\text{m}$  (lower magnification), 20  $\mu\text{m}$  (higher magnification).

**d** Representative Western blot and relative quantification of PCDH19 protein expression in the hippocampus of three different groups of male mice: WT, *Pcdh19* floxed (*Pcdh19<sup>fl/y</sup>*) and Syn1-Cre

mice. PCDH19 was normalized on GAPDH (N mice, WT 7, *Pcdh19*<sup>fl/y</sup> 6, Syn1-Cre 6; one-way ANOVA n.s.).

All data (**a**, **b**, **d**) are shown as means  $\pm$  SEM. See also Supplementary Table 12.

**Supplementary Fig. 8 LFP power spectral density at low-frequency bands is preserved in *Pcdh19* mosaic mice.**

LFP power spectral density in  $\delta$  (1-4 Hz) and  $\theta$  (4-8 Hz) bands from limbic system regions of *Pcdh19* mosaic mice (*Pcdh19*<sup>fl/y</sup> Syn1-Cre, Mosaic) and controls (*Pcdh19*<sup>fl/y</sup>, Ctrl) (N mice, Ctrl 2, Mosaic 2; Student's t-test, n.s.). Data are shown as means  $\pm$  SEM. See also Supplementary Table 13.

**Supplementary Fig. 9 LFP oscillations are affected in hippocampal slices from *Pcdh19* mosaic mice.**

**a** Representative LFP trace before and after lowpass filtering (1-150 Hz). LFP event amplitude and duration are shown.

**b-d** Representative LFP events (top) and quantification of LFP rate, amplitude, duration and synchronization (bottom) in hippocampal slices from mosaic mice (*Pcdh19*<sup>fl/x</sup> Syn1-Cre, Mosaic) and controls (*Pcdh19*<sup>fl/x</sup>, Ctrl) at P8-10 (**b**), P18-20 (**c**), and P60-90 (**d**) (P8-10: N slices, Ctrl 12, Mosaic 6, from 8 Ctrl and 4 Mosaic mice; P18-20: N slices, Ctrl 13, Mosaic 8, from 6 Ctrl and 4 Mosaic mice; P60-90: N slices, Ctrl 5, Mosaic 5, from 3 Ctrl and 3 Mosaic mice; Student's t-test, \*  $p < 0.05$ , \*\*  $p < 0.01$ ).

**e-g** Power spectral density of LFP bands (Hz,  $\alpha$  10-12,  $\beta$  12-25,  $\gamma$  25-100) in hippocampal slices from mice as in **b-d** at P8-10 (**e**), P18-20 (**f**), and P60-90 (**g**) (P8-10: N slices, Ctrl 12, Mosaic 6, from 8 Ctrl and 4 Mosaic mice; P18-20: N slices, Ctrl 13, Mosaic 8 from 6 Ctrl and 4 Mosaic mice; P60-90: N slices, Ctrl 13, Mosaic 8, from 3 Ctrl and 3 Mosaic mice; Student's t-test, \*  $p < 0.05$ , \*\*  $p < 0.01$ , \*\*\*  $p < 0.001$ ).

All data (**b-g**) are shown as means  $\pm$  SEM. See also Supplementary Table 14.

## **SUPPLEMENTARY REFERENCES**

1. Paxinos G, Franklin KB. The Mouse Brain in Stereotaxic Coordinates. Second Edi. 2004.

## SUPPLEMENTARY TABLES

**Supplementary table 1. Mean values, SEM, number of samples and p values of data displayed in Figure 1.**

| <b>Fig. 1b</b><br><i>Pchd19</i> mRNA | Mean   | SEM   | N | <b>p value</b><br>(Two – tailed unpaired Student's t – test) |
|--------------------------------------|--------|-------|---|--------------------------------------------------------------|
| Ctrl (Cortex)                        | 8.296  | 0.755 | 8 | Ctrl vs. Mosaic $p < 0.001$ (***)                            |
| Mosaic (Cortex)                      | 3.656  | 0.204 | 6 |                                                              |
| Ctrl (Hippocampus)                   | 10.240 | 0.510 | 7 | Ctrl vs. Mosaic $p = 0.001$ (**)                             |
| Mosaic (Hippocampus)                 | 5.799  | 0.947 | 7 |                                                              |

| <b>Fig. 1c</b><br>PCDH19 / GAPDH | Mean  | SEM   | N | <b>p value</b><br>(Two – tailed unpaired Student's t – test) |
|----------------------------------|-------|-------|---|--------------------------------------------------------------|
| Ctrl (Cortex)                    | 1.000 | 0.111 | 7 | Ctrl vs. Mosaic $p = 0.020$ (*)                              |
| Mosaic (Cortex)                  | 0.645 | 0.078 | 8 |                                                              |
| Ctrl (Hippocampus)               | 1.000 | 0.090 | 8 | Ctrl vs. Mosaic $p = 0.003$ (**)                             |
| Mosaic (Hippocampus)             | 0.602 | 0.059 | 7 |                                                              |

| <b>Fig. 1e</b><br>Weight (g) | Group  | Mean   | SEM   | N  | <b>p value</b><br>(Mixed – effect Two – way ANOVA, <i>post hoc</i> FDR) |
|------------------------------|--------|--------|-------|----|-------------------------------------------------------------------------|
| Week                         |        |        |       |    |                                                                         |
| 3                            | Ctrl   | 7.876  | 0.283 | 18 | Ctrl vs. Mosaic<br>$p = 0.041$ (*)                                      |
|                              | Mosaic | 7.165  | 0.205 | 20 |                                                                         |
| 4                            | Ctrl   | 11.961 | 0.683 | 20 | Ctrl vs. Mosaic<br>$p = 0.021$ (*)                                      |
|                              | Mosaic | 9.898  | 0.432 | 19 |                                                                         |
| 5                            | Ctrl   | 14.762 | 0.693 | 16 | Ctrl vs. Mosaic<br>$p = 0.010$ (**)                                     |
|                              | Mosaic | 12.222 | 0.389 | 17 |                                                                         |
| 6                            | Ctrl   | 16.664 | 0.403 | 22 | Ctrl vs. Mosaic<br>$p = 0.007$ (**)                                     |
|                              | Mosaic | 14.334 | 0.512 | 14 |                                                                         |
| 7                            | Ctrl   | 18.075 | 0.423 | 18 | Ctrl vs. Mosaic<br>$p = 0.015$ (**)                                     |
|                              | Mosaic | 16.634 | 0.290 | 20 |                                                                         |
| 8                            | Ctrl   | 19.049 | 0.458 | 17 | Ctrl vs. Mosaic<br>$p = 0.025$ (*)                                      |
|                              | Mosaic | 17.634 | 0.377 | 14 |                                                                         |
| 9                            | Ctrl   | 20.661 | 0.397 | 11 | Ctrl vs. Mosaic<br>$p = 0.041$ (*)                                      |
|                              | Mosaic | 19.046 | 0.673 | 9  |                                                                         |
| 10                           | Ctrl   | 19.913 | 0.507 | 12 | Ctrl vs. Mosaic<br>$p = 0.316$ (n.s.)                                   |
|                              | Mosaic | 19.585 | 0.351 | 10 |                                                                         |

| 11         | Ctrl   | 21.125  | 0.538 | 8  | Ctrl vs. Mosaic<br>p = 0.074 (n.s.)                              |
|------------|--------|---------|-------|----|------------------------------------------------------------------|
|            | Mosaic | 19.952  | 0.491 | 11 |                                                                  |
| 12         | Ctrl   | 22.049  | 0.342 | 17 | Ctrl vs. Mosaic<br>p = 0.074 (n.s.)                              |
|            | Mosaic | 21.076  | 0.508 | 12 |                                                                  |
| Weight (%) | Group  | Mean    | SEM   | N  | p value<br>(Mixed – effect Two – way ANOVA, <i>post hoc</i> FDR) |
| Week       |        |         |       |    |                                                                  |
| 3          | Ctrl   | 100.000 | 3.598 | 18 | Ctrl vs. Mosaic<br>p = 0.044 (*)                                 |
|            | Mosaic | 90.971  | 2.603 | 20 |                                                                  |
| 4          | Ctrl   | 100.000 | 5.708 | 20 | Ctrl vs. Mosaic<br>p = 0.021(*)                                  |
|            | Mosaic | 82.756  | 3.609 | 19 |                                                                  |
| 5          | Ctrl   | 100.000 | 4.694 | 16 | Ctrl vs. Mosaic<br>p = 0.010 (**)                                |
|            | Mosaic | 82.797  | 2.633 | 17 |                                                                  |
| 6          | Ctrl   | 100.000 | 2.421 | 22 | Ctrl vs. Mosaic<br>p = 0.007 (**)                                |
|            | Mosaic | 86.017  | 3.071 | 14 |                                                                  |
| 7          | Ctrl   | 99.910  | 2.338 | 18 | Ctrl vs. Mosaic<br>p = 0.015 (*)                                 |
|            | Mosaic | 92.028  | 1.608 | 20 |                                                                  |
| 8          | Ctrl   | 99.910  | 2.403 | 17 | Ctrl vs. Mosaic<br>p = 0.025 (*)                                 |
|            | Mosaic | 92.568  | 1.981 | 14 |                                                                  |
| 9          | Ctrl   | 99.910  | 1.920 | 11 | Ctrl vs. Mosaic<br>p = 0.044 (*)                                 |
|            | Mosaic | 92.182  | 3.259 | 9  |                                                                  |
| 10         | Ctrl   | 100.000 | 2.548 | 12 | Ctrl vs. Mosaic<br>p = 0.316 (n.s.)                              |
|            | Mosaic | 98.355  | 1.764 | 10 |                                                                  |
| 11         | Ctrl   | 100.000 | 2.548 | 8  | Ctrl vs. Mosaic<br>p = 0.074 (n.s.)                              |
|            | Mosaic | 94.446  | 2.323 | 11 |                                                                  |
| 12         | Ctrl   | 99.910  | 1.552 | 17 | Ctrl vs. Mosaic<br>p = 0.074 (n.s.)                              |
|            | Mosaic | 95.585  | 2.305 | 12 |                                                                  |

| <b>Fig. 1f</b>  |        |        |       |    |                                                                  |
|-----------------|--------|--------|-------|----|------------------------------------------------------------------|
| Weight gain (%) | Group  | Mean   | SEM   | N  | p value<br>(Mixed – effect Two – way ANOVA, <i>post hoc</i> FDR) |
| Week            |        |        |       |    |                                                                  |
| 3 – 4           | Ctrl   | 52.766 | 5.026 | 16 | Ctrl vs. Mosaic<br>p = 0.003 (**)                                |
|                 | Mosaic | 38.254 | 3.083 | 19 |                                                                  |
| 4 – 5           | Ctrl   | 27.217 | 4.655 | 14 | Ctrl vs. Mosaic<br>p = 0.667 (n.s.)                              |
|                 | Mosaic | 22.931 | 4.750 | 16 |                                                                  |
| 5 – 6           | Ctrl   | 14.121 | 3.179 | 16 | Ctrl vs. Mosaic<br>p = 0.506 (n.s.)                              |
|                 | Mosaic | 20.289 | 3.712 | 11 |                                                                  |
| 6 – 7           | Ctrl   | 7.395  | 1.222 | 18 | Ctrl vs. Mosaic<br>p = 0.427 (n.s.)                              |
|                 | Mosaic | 14.269 | 2.532 | 14 |                                                                  |
| 7 – 8           | Ctrl   | 6.615  | 0.820 | 16 | Ctrl vs. Mosaic<br>p = 0.933 (n.s.)                              |
|                 | Mosaic | 8.588  | 0.777 | 14 |                                                                  |
| 8 – 9           | Ctrl   | 3.520  | 1.109 | 7  | Ctrl vs. Mosaic<br>p = 0.933 (n.s.)                              |
|                 | Mosaic | 4.380  | 0.984 | 6  |                                                                  |
| 9 – 10          | Ctrl   | -0.778 | 0.571 | 3  | Ctrl vs. Mosaic<br>p = 0.933 (n.s.)                              |
|                 | Mosaic | 2.243  | 1.535 | 5  |                                                                  |
| 10 – 11         | Ctrl   | 2.518  | 0     | 1  | Ctrl vs. Mosaic<br>p = 0.933 (n.s.)                              |
|                 | Mosaic | 2.518  | 1.463 | 8  |                                                                  |
| 11 – 12         | Ctrl   | 3.877  | 0.277 | 7  | Ctrl vs. Mosaic                                                  |

|  |        |       |       |   |                  |
|--|--------|-------|-------|---|------------------|
|  | Mosaic | 3.889 | 1.351 | 8 | p = 0.933 (n.s.) |
|--|--------|-------|-------|---|------------------|

| Weight gain (g) | Mean  | SEM   | N  | p value<br>(Two – tailed unpaired Student's t – test) |                  |
|-----------------|-------|-------|----|-------------------------------------------------------|------------------|
| Ctrl            | 13.77 | 0.269 | 13 | Ctrl vs. Mosaic                                       | p = 0.894 (n.s.) |
| Mosaic          | 13.84 | 0.445 | 12 |                                                       |                  |

| Fig. 1g<br>Stage / time<br>(min) | Group  | Mean  | SEM   | N | p value<br>(Two – way ANOVA, <i>post hoc</i> FDR) |                  |
|----------------------------------|--------|-------|-------|---|---------------------------------------------------|------------------|
| 2 min                            | Ctrl   | 0.625 | 0.183 | 8 | Ctrl vs. Mosaic                                   | p = 0.126 (n.s.) |
|                                  | Mosaic | 1.375 | 0.375 | 8 |                                                   |                  |
| 3 min                            | Ctrl   | 0.750 | 0.164 | 8 | Ctrl vs. Mosaic                                   | p = 0.068 (n.s.) |
|                                  | Mosaic | 2.125 | 0.549 | 8 |                                                   |                  |
| 4 min                            | Ctrl   | 0.875 | 0.125 | 8 | Ctrl vs. Mosaic                                   | p = 0.049 (*)    |
|                                  | Mosaic | 2.375 | 0.532 | 8 |                                                   |                  |
| 5 min                            | Ctrl   | 0.875 | 0.125 | 8 | Ctrl vs. Mosaic                                   | p = 0.021 (*)    |
|                                  | Mosaic | 2.875 | 0.549 | 8 |                                                   |                  |
| 6 min                            | Ctrl   | 0.875 | 0.125 | 8 | Ctrl vs. Mosaic                                   | p = 0.016 (*)    |
|                                  | Mosaic | 3.250 | 0.491 | 8 |                                                   |                  |
| 7 min                            | Ctrl   | 1.125 | 0.295 | 8 | Ctrl vs. Mosaic                                   | p = 0.016 (*)    |
|                                  | Mosaic | 3.375 | 0.532 | 8 |                                                   |                  |
| 8 min                            | Ctrl   | 1.375 | 0.324 | 8 | Ctrl vs. Mosaic                                   | p = 0.021 (*)    |
|                                  | Mosaic | 3.375 | 0.532 | 8 |                                                   |                  |
| 9 min                            | Ctrl   | 1.125 | 0.295 | 8 | Ctrl vs. Mosaic                                   | p = 0.016 (*)    |
|                                  | Mosaic | 3.625 | 0.596 | 8 |                                                   |                  |
| 10 min                           | Ctrl   | 1.125 | 0.295 | 8 | Ctrl vs. Mosaic                                   | p = 0.016 (*)    |
|                                  | Mosaic | 3.500 | 0.463 | 8 |                                                   |                  |
| 11 min                           | Ctrl   | 1.375 | 0.420 | 8 | Ctrl vs. Mosaic                                   | p = 0.016 (*)    |
|                                  | Mosaic | 3.375 | 0.420 | 8 |                                                   |                  |
| 12 min                           | Ctrl   | 1.375 | 0.420 | 8 | Ctrl vs. Mosaic                                   | p = 0.028 (*)    |
|                                  | Mosaic | 3.250 | 0.491 | 8 |                                                   |                  |
| 13 min                           | Ctrl   | 1.875 | 0.479 | 8 | Ctrl vs. Mosaic                                   | p = 0.077 (n.s.) |
|                                  | Mosaic | 3.375 | 0.532 | 8 |                                                   |                  |
| 14 min                           | Ctrl   | 1.625 | 0.420 | 8 | Ctrl vs. Mosaic                                   | p = 0.042 (*)    |
|                                  | Mosaic | 3.500 | 0.567 | 8 |                                                   |                  |
| 15 min                           | Ctrl   | 2.000 | 0.463 | 8 | Ctrl vs. Mosaic                                   | p = 0.067 (n.s.) |
|                                  | Mosaic | 3.500 | 0.463 | 8 |                                                   |                  |
| 16 min                           | Ctrl   | 2.000 | 0.535 | 8 | Ctrl vs. Mosaic                                   | p = 0.084 (n.s.) |
|                                  | Mosaic | 3.375 | 0.420 | 8 |                                                   |                  |
| 17 min                           | Ctrl   | 2.125 | 0.549 | 8 | Ctrl vs. Mosaic                                   | p = 0.072 (n.s.) |
|                                  | Mosaic | 3.500 | 0.267 | 8 |                                                   |                  |
| 18 min                           | Ctrl   | 2.125 | 0.549 | 8 | Ctrl vs. Mosaic                                   | p = 0.016 (*)    |
|                                  | Mosaic | 4.000 | 0.378 | 8 |                                                   |                  |
| 19 min                           | Ctrl   | 2.250 | 0.412 | 8 | Ctrl vs. Mosaic                                   | p = 0.308 (n.s.) |
|                                  | Mosaic | 3.000 | 0.627 | 8 |                                                   |                  |
| 20 min                           | Ctrl   | 2.000 | 0.535 | 8 | Ctrl vs. Mosaic                                   | p = 0.558 (n.s.) |
|                                  | Mosaic | 2.250 | 0.526 | 8 |                                                   |                  |
| 21 min                           | Ctrl   | 2.125 | 0.515 | 8 | Ctrl vs. Mosaic                                   | p = 0.474 (n.s.) |
|                                  | Mosaic | 2.500 | 0.500 | 8 |                                                   |                  |
| 22 min                           | Ctrl   | 1.625 | 0.375 | 8 | Ctrl vs. Mosaic                                   | p = 0.157 (n.s.) |

|                               |        |             |            |          |                                                              |
|-------------------------------|--------|-------------|------------|----------|--------------------------------------------------------------|
|                               | Mosaic | 2.625       | 0.532      | 8        |                                                              |
| 23 min                        | Ctrl   | 1.500       | 0.423      | 8        | Ctrl vs. Mosaic    p = 0.134 (n.s.)                          |
|                               | Mosaic | 2.625       | 0.532      | 8        |                                                              |
| 24 min                        | Ctrl   | 1.375       | 0.324      | 8        | Ctrl vs. Mosaic    p = 0.359 (n.s.)                          |
|                               | Mosaic | 1.875       | 0.515      | 8        |                                                              |
| 25 min                        | Ctrl   | 2.125       | 0.515      | 8        | Ctrl vs. Mosaic    p = 0.635 (n.s.)                          |
|                               | Mosaic | 2.000       | 0.598      | 8        |                                                              |
| 26 min                        | Ctrl   | 1.500       | 0.423      | 8        | Ctrl vs. Mosaic    p = 290 (n.s.)                            |
|                               | Mosaic | 2.250       | 0.559      | 8        |                                                              |
| 27 min                        | Ctrl   | 1.750       | 0.453      | 8        | Ctrl vs. Mosaic    p = 0.403 (n.s.)                          |
|                               | Mosaic | 2.250       | 0.559      | 8        |                                                              |
| 28 min                        | Ctrl   | 1.625       | 0.460      | 8        | Ctrl vs. Mosaic    p = 0.288 (n.s.)                          |
|                               | Mosaic | 2.375       | 0.498      | 8        |                                                              |
| 29 min                        | Ctrl   | 1.625       | 0.420      | 8        | Ctrl vs. Mosaic    p = 0.133 (n.s.)                          |
|                               | Mosaic | 2.625       | 0.420      | 8        |                                                              |
| 30 min                        | Ctrl   | 1.500       | 0.420      | 8        | Ctrl vs. Mosaic    p = 0.344 (n.s.)                          |
|                               | Mosaic | 2.000       | 0.378      | 8        |                                                              |
| <b>Latency to onset (min)</b> |        | <b>Mean</b> | <b>SEM</b> | <b>N</b> | <b>p value</b><br>(Two – tailed unpaired Student’s t – test) |
| Ctrl                          |        | 15.43       | 0.00       | 1        | Ctrl vs. Mosaic    p = 0.346 (n.s.)                          |
| Mosaic                        |        | 11.08       | 3.87       | 6        |                                                              |

**Supplementary table 2. Mean values, SEM, number of samples and p values of data displayed in Figure 2.**

| Fig. 2a                  |       |       |    |                                                       |
|--------------------------|-------|-------|----|-------------------------------------------------------|
| Horizontal movements (n) | Mean  | SEM   | N  | p value<br>(Two – tailed unpaired Student’s t – test) |
| Ctrl                     | 1217  | 92.26 | 11 | Ctrl vs. Mosaic    p = 0.206 (n.s.)                   |
| Mosaic                   | 1395  | 100.5 | 10 |                                                       |
| Vertical movements (n)   | Mean  | SEM   | N  | p value<br>(Two – tailed unpaired Student’s t – test) |
| Ctrl                     | 150.3 | 14.81 | 11 | Ctrl vs. Mosaic    p = 0.340 (n.s.)                   |
| Mosaic                   | 170.0 | 13.52 | 10 |                                                       |

| Fig. 2b                |       |       |   |                                                       |
|------------------------|-------|-------|---|-------------------------------------------------------|
| Events > 25 sec<br>(n) | Mean  | SEM   | N | p value<br>(Two – tailed unpaired Student’s t – test) |
| Ctrl                   | 0.400 | 0.245 | 5 | Ctrl vs. Mosaic    p = 0.033 (*)                      |
| Mosaic                 | 1.500 | 0.342 | 6 |                                                       |
| Duration (s)           | Mean  | SEM   | N | p value<br>(Two – tailed unpaired Student’s t – test) |
| Ctrl                   | 60.83 | 14.46 | 6 | Ctrl vs. Mosaic    p = 0.187 (n.s.)                   |
| Mosaic                 | 116.7 | 36.63 | 6 |                                                       |

| Fig. 2c | Group | Mean | SEM | N |  |
|---------|-------|------|-----|---|--|
|---------|-------|------|-----|---|--|



| Index<br>(N – F) / (N + F) |        |       |       |    | p value<br>(Two – way ANOVA)    |
|----------------------------|--------|-------|-------|----|---------------------------------|
| Time                       |        |       |       |    |                                 |
| 5 min                      | Ctrl   | 0.199 | 0.068 | 10 | Ctrl vs. Mosaic p > 0.05 (n.s.) |
|                            | Mosaic | 0.172 | 0.070 | 10 |                                 |
| 120 min                    | Ctrl   | 0.240 | 0.055 | 10 |                                 |
|                            | Mosaic | 0.189 | 0.070 | 10 |                                 |
| 24 h                       | Ctrl   | 0.249 | 0.059 | 10 |                                 |
|                            | Mosaic | 0.267 | 0.056 | 10 |                                 |

| Fig. 2d            |       |       |    |                                                                                                                                                                      |
|--------------------|-------|-------|----|----------------------------------------------------------------------------------------------------------------------------------------------------------------------|
| Escape latency (s) | Mean  | SEM   | N  |                                                                                                                                                                      |
| Acquisition phase  |       |       |    | p value<br>(One – way ANOVA, <i>post hoc</i> FDR)                                                                                                                    |
| Ctrl               |       |       |    |                                                                                                                                                                      |
| 1°day              | 30.79 | 4.342 | 11 | 1°day vs 2°day p = 0.001 (##)<br>1°day vs 3°day p = 0.001 (##)<br>1°day vs 4°day p = 0.009 (##)                                                                      |
| 2°day              | 15.01 | 3.601 | 11 |                                                                                                                                                                      |
| 3°day              | 10.34 | 2.009 | 11 |                                                                                                                                                                      |
| 4°day              | 13.25 | 3.537 | 11 |                                                                                                                                                                      |
| Mosaic             |       |       |    |                                                                                                                                                                      |
| 1°day              | 27.12 | 4.856 | 10 | 1°day vs 2°day p = 0.464 (n.s.)<br>1°day vs 3°day p = 0.082 (n.s.)<br>1°day vs 4°day p = 0.013 (§)                                                                   |
| 2°day              | 24.00 | 4.383 | 10 |                                                                                                                                                                      |
| 3°day              | 15.82 | 3.092 | 10 |                                                                                                                                                                      |
| 4°day              | 10.69 | 2.144 | 10 |                                                                                                                                                                      |
|                    |       |       |    | p value<br>(Two – way ANOVA, <i>post hoc</i> FDR)                                                                                                                    |
|                    |       |       |    | 1°day Ctrl vs. Mosaic p = 0.609 (n.s.)<br>2°day Ctrl vs. Mosaic p = 0.329 (n.s.)<br>3°day Ctrl vs. Mosaic p = 0.329 (n.s.)<br>4°day Ctrl vs. Mosaic p = 0.609 (n.s.) |
| Probe              |       |       |    | p value<br>(Two – tailed unpaired Student's t – test)                                                                                                                |
| Ctrl               | 10.89 | 3.84  | 11 | Ctrl vs. Mosaic p = 0.797 (n.s.)                                                                                                                                     |
| Mosaic             | 9.672 | 2.62  | 10 |                                                                                                                                                                      |
| Reversal phase     |       |       |    | p value<br>(One – way ANOVA, <i>post hoc</i> FDR)                                                                                                                    |
| Ctrl               |       |       |    |                                                                                                                                                                      |
| 1°day              | 18.32 | 3.377 | 11 | 1°day vs 2°day p = 0.004 (##)<br>1°day vs 3°day p = 0.004 (##)<br>1°day vs 4°day p = 0.004 (##)                                                                      |
| 2°day              | 7.606 | 1.141 | 11 |                                                                                                                                                                      |
| 3°day              | 5.585 | 0.759 | 11 |                                                                                                                                                                      |
| 4°day              | 5.195 | 0.635 | 11 |                                                                                                                                                                      |
| Mosaic             |       |       |    |                                                                                                                                                                      |
| 1°day              | 22.03 | 3.023 | 10 | 1°day vs 2°day p < 0.0001 (\$\$\$)<br>1°day vs 3°day p = 0.003 (§§)<br>1°day vs 4°day p = 0.002 (§§)                                                                 |
| 2°day              | 10.82 | 2.719 | 10 |                                                                                                                                                                      |
| 3°day              | 10.48 | 2.109 | 10 |                                                                                                                                                                      |
| 4°day              | 8.037 | 1.525 | 10 |                                                                                                                                                                      |
|                    |       |       |    | p value<br>(Two – way ANOVA, <i>post hoc</i> FDR)                                                                                                                    |

|        |       |       |    |                                                              |                 |                  |
|--------|-------|-------|----|--------------------------------------------------------------|-----------------|------------------|
|        |       |       |    | 1°day                                                        | Ctrl vs. Mosaic | p = 0.444 (n.s.) |
|        |       |       |    | 2°day                                                        | Ctrl vs. Mosaic | p = 0.415 (n.s.) |
|        |       |       |    | 3°day                                                        | Ctrl vs. Mosaic | p = 0.214 (n.s.) |
|        |       |       |    | 4°day                                                        | Ctrl vs. Mosaic | p = 0.233 (n.s.) |
| Probe  |       |       |    | <b>p value</b><br>(Two – tailed unpaired Student's t – test) |                 |                  |
| Ctrl   | 3.520 | 1.217 | 11 | Ctrl vs. Mosaic p = 0.115 (n.s.)                             |                 |                  |
| Mosaic | 10.18 | 4.021 | 10 |                                                              |                 |                  |

| <b>Fig. 2e</b>    |        |       |      |    |                                                          |
|-------------------|--------|-------|------|----|----------------------------------------------------------|
| Freezing time (s) | Group  | Mean  | SEM  | N  |                                                          |
| Conditioning      |        |       |      |    | <b>p value</b><br>(Two – way ANOVA)                      |
| 1 min             | Ctrl   | 40.31 | 3.30 | 10 | Ctrl vs. Mosaic p > 0.05 (n.s.)                          |
|                   | Mosaic | 40.18 | 4.40 | 9  |                                                          |
| 2 min             | Ctrl   | 42.12 | 3.82 | 10 |                                                          |
|                   | Mosaic | 40.28 | 3.72 | 9  |                                                          |
| 3 min             | Ctrl   | 44.77 | 2.46 | 10 |                                                          |
|                   | Mosaic | 44.53 | 3.20 | 9  |                                                          |
| 4 min             | Ctrl   | 50.62 | 1.76 | 10 |                                                          |
|                   | Mosaic | 50.14 | 2.21 | 9  |                                                          |
| 5 min             | Ctrl   | 51.68 | 1.35 | 10 |                                                          |
|                   | Mosaic | 54.10 | 1.47 | 9  |                                                          |
| 6min              | Ctrl   | 53.57 | 2.87 | 10 |                                                          |
|                   | Mosaic | 52.08 | 1.70 | 9  |                                                          |
| 7 min             | Ctrl   | 55.97 | 1.41 | 10 |                                                          |
|                   | Mosaic | 55.49 | 2.74 | 9  |                                                          |
| Context           |        |       |      |    | <b>p value</b><br>(Two – way ANOVA, <i>post hoc</i> FDR) |
| 1 min             | Ctrl   | 45.12 | 3.71 | 10 | Ctrl vs. Mosaic p = 0.099 (n.s.)                         |
|                   | Mosaic | 41.04 | 3.82 | 9  |                                                          |
| 2 min             | Ctrl   | 52.67 | 3.23 | 10 | Ctrl vs. Mosaic p = 0.013 (*)                            |
|                   | Mosaic | 45.69 | 3.19 | 9  |                                                          |
| 3 min             | Ctrl   | 55.60 | 3.07 | 10 | Ctrl vs. Mosaic p = 0.007 (**)                           |
|                   | Mosaic | 45.74 | 3.18 | 9  |                                                          |
| 4 min             | Ctrl   | 55.25 | 2.35 | 10 | Ctrl vs. Mosaic p = 0.034 (*)                            |
|                   | Mosaic | 47.39 | 4.74 | 9  |                                                          |
| 5 min             | Ctrl   | 54.51 | 1.98 | 10 | Ctrl vs. Mosaic p = 0.013 (*)                            |
|                   | Mosaic | 44.27 | 3.63 | 9  |                                                          |
| Cued              |        |       |      |    | <b>p value</b><br>(Two – way ANOVA)                      |
| 1 min             | Ctrl   | 32.93 | 1.97 | 10 | Ctrl vs. Mosaic p > 0.05 (n.s.)                          |
|                   | Mosaic | 31.60 | 3.87 | 9  |                                                          |
| 2 min             | Ctrl   | 39.59 | 3.12 | 10 |                                                          |
|                   | Mosaic | 41.59 | 3.07 | 9  |                                                          |
| 3 min             | Ctrl   | 46.31 | 3.21 | 10 |                                                          |
|                   | Mosaic | 49.40 | 3.23 | 9  |                                                          |
| 4 min             | Ctrl   | 47.41 | 2.25 | 10 |                                                          |
|                   | Mosaic |       |      |    |                                                          |

|       |        |       |      |    |  |
|-------|--------|-------|------|----|--|
|       | Mosaic | 48.91 | 3.60 | 9  |  |
| 5 min | Ctrl   | 46.72 | 2.52 | 10 |  |
|       | Mosaic | 47.02 | 3.59 | 9  |  |

| Fig. 2f      |       |       |    |                                                       |
|--------------|-------|-------|----|-------------------------------------------------------|
| fEPSP slope  | Mean  | SEM   | N  | p value<br>(Two – tailed unpaired Student’s t – test) |
| First 10 min |       |       |    |                                                       |
| Ctrl         | 182.8 | 11.12 | 10 | Ctrl vs. Mosaic    p = 0.002 (**)                     |
| Mosaic       | 135.3 | 6.078 | 10 |                                                       |
| Last 10 min  |       |       |    |                                                       |
| Ctrl         | 190.3 | 18.28 | 10 | Ctrl vs. Mosaic    p = 0.010 (**)                     |
| Mosaic       | 130.2 | 9.918 | 10 |                                                       |

| <b>Fig. 2g</b>   |             |            |          |                                                              |               |
|------------------|-------------|------------|----------|--------------------------------------------------------------|---------------|
| <b>fEPSP PPR</b> | <b>Mean</b> | <b>SEM</b> | <b>N</b> | <b>p value</b><br>(Two – tailed unpaired Student's t – test) |               |
| Ctrl             | 1.696       | 0.072      | 11       | Ctrl vs. Mosaic                                              | p = 0.040 (*) |
| Mosaic           | 1.483       | 0.063      | 10       |                                                              |               |

| Fig. 2h                                   |       |       |    |                                                       |
|-------------------------------------------|-------|-------|----|-------------------------------------------------------|
| Synapse density<br>(N / $\mu\text{m}^3$ ) | Mean  | SEM   | N  | p value<br>(Two – tailed unpaired Student’s t – test) |
| Ctrl                                      | 1.955 | 0.111 | 30 | Ctrl vs. Mosaic    p = 0.005 (**)                     |
| Mosaic                                    | 1.523 | 0.096 | 30 |                                                       |
| PSD thickness<br>(nm)                     | Mean  | SEM   | N  | p value<br>(Mann – Whitney test)                      |
| Ctrl                                      | 66.09 | 2.371 | 53 | Ctrl vs. Mosaic    p <0.001 (***)                     |
| Mosaic                                    | 50.00 | 1.806 | 56 |                                                       |
| PSD length (nm)                           | Mean  | SEM   | N  | p value<br>(Mann – Whitney test)                      |
| Ctrl                                      | 266.7 | 10.74 | 53 | Ctrl vs. Mosaic    p = 0.019 (*)                      |
| Mosaic                                    | 304.2 | 11.72 | 56 |                                                       |
| SAL<br>(nm)                               | Mean  | SEM   | N  | p value<br>(Mann – Whitney test)                      |
| Ctrl                                      | 253.8 | 13.81 | 52 | Ctrl vs. Mosaic    p = 0.001 (**)                     |
| Mosaic                                    | 306.7 | 11.39 | 53 |                                                       |
| Spine head area<br>( $\mu\text{m}^2$ )    | Mean  | SEM   | N  | p value<br>(Two – tailed unpaired Student’s t – test) |
| Ctrl                                      | 0.137 | 0.023 | 53 | Ctrl vs. Mosaic    p = 0.780 (n.s.)                   |
| Mosaic                                    | 0.112 | 0.007 | 53 |                                                       |
|                                           |       |       |    |                                                       |

| Presynaptic area<br>( $\mu\text{m}^2$ )                      | Mean    | SEM       | N                                                                               | p value<br>(Mann – Whitney test)    |
|--------------------------------------------------------------|---------|-----------|---------------------------------------------------------------------------------|-------------------------------------|
| Ctrl                                                         | 0.191   | 0.017     | 52                                                                              | Ctrl vs. Mosaic    p = 0.084 (n.s.) |
| Mosaic                                                       | 0.227   | 0.017     | 53                                                                              |                                     |
| Vesicle density<br>(N / $\mu\text{m}^2$ )                    | Mean    | SEM       | N                                                                               | p value<br>(Mann – Whitney test)    |
| Ctrl                                                         | 417.9   | 21.78     | 53                                                                              | Ctrl vs. Mosaic    p < 0.001 (***)  |
| Mosaic                                                       | 310.2   | 19.73     | 53                                                                              |                                     |
| Distribution of PSD<br>thickness (nm)                        | Ctrl, % | Mosaic, % | p value<br>(Comparison of Z-score, Mann-Whitney test)                           |                                     |
| 10                                                           | 0.00    | 1.79      | Ctrl vs. Mosaic    p = 0.742 (n.s.)                                             |                                     |
| 20                                                           | 0.00    | 0.00      |                                                                                 |                                     |
| 30                                                           | 0.00    | 7.14      |                                                                                 |                                     |
| 40                                                           | 7.55    | 26.79     |                                                                                 |                                     |
| 50                                                           | 18.87   | 37.50     |                                                                                 |                                     |
| 60                                                           | 26.42   | 12.50     |                                                                                 |                                     |
| 70                                                           | 24.53   | 10.71     |                                                                                 |                                     |
| 80                                                           | 13.21   | 1.79      |                                                                                 |                                     |
| 90                                                           | 3.77    | 1.79      |                                                                                 |                                     |
| 100                                                          | 1.89    | 0.00      |                                                                                 |                                     |
| 110                                                          | 1.89    | 0.00      |                                                                                 |                                     |
| 120                                                          | 0.00    | 0.00      |                                                                                 |                                     |
| 130                                                          | 1.89    | 0.00      |                                                                                 |                                     |
| 140                                                          | 0.00    | 0.00      |                                                                                 |                                     |
| Distribution of<br>vesicle density<br>(N / $\mu\text{m}^2$ ) | Ctrl, % | Mosaic, % | p value<br>(Comparison of Z-score, Two – tailed unpaired<br>Student’s t – test) |                                     |
| 100                                                          | 3.77    | 5.56      | Ctrl vs. Mosaic    p = 0.986 (n.s.)                                             |                                     |
| 200                                                          | 9.43    | 35.19     |                                                                                 |                                     |
| 300                                                          | 22.64   | 24.07     |                                                                                 |                                     |
| 400                                                          | 28.30   | 14.81     |                                                                                 |                                     |
| 500                                                          | 16.98   | 9.26      |                                                                                 |                                     |
| 600                                                          | 7.55    | 9.26      |                                                                                 |                                     |
| 700                                                          | 9.43    | 0.00      |                                                                                 |                                     |
| 800                                                          | 0.00    | 1.85      |                                                                                 |                                     |
| 900                                                          | 1.89    | 0.00      |                                                                                 |                                     |

| <b>Fig. 2i</b>                           |      |     |   |                                                       |
|------------------------------------------|------|-----|---|-------------------------------------------------------|
| Pre-synaptic area<br>( $\mu\text{m}^2$ ) | Mean | SEM | N | p value<br>(Two – tailed unpaired Student's t – test) |

|                                                                                 |                |            |                  |                                                                                        |
|---------------------------------------------------------------------------------|----------------|------------|------------------|----------------------------------------------------------------------------------------|
| Ctrl                                                                            | 0.238          | 0.036      | 20               | Ctrl vs. Mosaic    p = 0.122 (n.s.)                                                    |
| Mosaic                                                                          | 0.347          | 0.061      | 18               |                                                                                        |
| <b>Vesicle density<br/>(N / <math>\mu\text{m}^2</math>)</b>                     | <b>Mean</b>    | <b>SEM</b> | <b>N</b>         | <b>p value</b><br>(Two – tailed unpaired Student’s t – test)                           |
| Ctrl                                                                            | 257.2          | 29.64      | 20               | Ctrl vs. Mosaic    p = 0.044 (*)                                                       |
|                                                                                 | 185.4          | 15.1       | 18               |                                                                                        |
| <b>Distribution of<br/>vesicle density<br/>(N / <math>\mu\text{m}^2</math>)</b> | <b>Ctrl, %</b> |            | <b>Mosaic, %</b> | <b>p value</b><br>(Comparison of Z-score, Two – tailed<br>unpaired Student’s t – test) |
| 100                                                                             | 20.00          |            | 33.33            | Ctrl vs. Mosaic    p = 0.114 (n.s.)                                                    |
| 200                                                                             | 40.00          |            | 61.11            |                                                                                        |
| 300                                                                             | 20.00          |            | 0.00             |                                                                                        |
| 400                                                                             | 15.00          |            | 5.56             |                                                                                        |
| 500                                                                             | 0.00           |            | 0.00             |                                                                                        |
| 600                                                                             | 5.00           |            | 0.00             |                                                                                        |
| 700                                                                             | 0.00           |            | 0.00             |                                                                                        |

**Supplementary table 3. Mean values, SEM, number of samples and p values of data displayed in Figure 3.**

|                              |              |             |            |          |                                                          |
|------------------------------|--------------|-------------|------------|----------|----------------------------------------------------------|
| <b>Fig. 3b</b>               |              |             |            |          |                                                          |
| <b>AP frequency<br/>(Hz)</b> | <b>DGGCs</b> | <b>Mean</b> | <b>SEM</b> | <b>N</b> | <b>p value</b><br>(Two – way ANOVA, <i>post hoc</i> FDR) |
| 0 pA                         | PCDH19 +     | 0.000       | 0          | 11       | PCDH19 + vs. PCDH19 –<br>$p = 0.453$ (n.s.)              |
|                              | PCDH19 -     | 0.625       | 0.34       | 16       |                                                          |
| 10 pA                        | PCDH19 +     | 0.546       | 0.55       | 11       | PCDH19 + vs. PCDH19 –<br>$p = 0.173$ (n.s.)              |
|                              | PCDH19 -     | 3.500       | 0.92       | 16       |                                                          |
| 20 pA                        | PCDH19 +     | 1.727       | 1.36       | 11       | PCDH19 + vs. PCDH19 –<br>$p = 0.048$ (*)                 |
|                              | PCDH19 -     | 6.938       | 1.27       | 16       |                                                          |
| 30 pA                        | PCDH19 +     | 3.182       | 1.56       | 11       | PCDH19 + vs. PCDH19 –<br>$p = 0.026$ (*)                 |
|                              | PCDH19 -     | 9.500       | 1.53       | 16       |                                                          |
| 40 pA                        | PCDH19 +     | 5.000       | 2          | 11       | PCDH19 + vs. PCDH19 –<br>$p = 0.019$ (*)                 |
|                              | PCDH19 -     | 12.13       | 1.63       | 16       |                                                          |
| 50 pA                        | PCDH19 +     | 6.364       | 2.20       | 11       | PCDH19 + vs. PCDH19 –<br>$p = 0.019$ (*)                 |
|                              | PCDH19 -     | 13.25       | 1.75       | 16       |                                                          |
| 60 pA                        | PCDH19 +     | 7.727       | 2.21       | 11       | PCDH19 + vs. PCDH19 –<br>$p = 0.019$ (*)                 |
|                              | PCDH19 -     | 14.69       | 1.91       | 16       |                                                          |
| 70 pA                        | PCDH19 +     | 9.182       | 2.22       | 11       | PCDH19 + vs. PCDH19 –<br>$p = 0.026$ (*)                 |
|                              | PCDH19 -     | 15.56       | 1.98       | 16       |                                                          |
| 80 pA                        | PCDH19 +     | 10.36       | 2.09       | 11       | PCDH19 + vs. PCDH19 –<br>$p = 0.030$ (n.s.)              |
|                              | PCDH19 -     | 16.38       | 2.03       | 16       |                                                          |
| 90 pA                        | PCDH19 +     | 11.00       | 2.09       | 11       | PCDH19 + vs. PCDH19 –<br>$p = 0.026$ (*)                 |
|                              | PCDH19 -     | 17.25       | 1.98       | 16       |                                                          |
| 100 pA                       | PCDH19 +     | 10.55       | 1.75       | 11       | PCDH19 + vs. PCDH19 –<br>$p = 0.019$ (*)                 |
|                              | PCDH19 -     | 17.81       | 2.09       | 16       |                                                          |
| 110 pA                       | PCDH19 +     | 10.64       | 1.70       | 11       | PCDH19 + vs. PCDH19 –                                    |

|        |          |        |       |    |                       |
|--------|----------|--------|-------|----|-----------------------|
|        | PCDH19 - | 17.88  | 2.08  | 16 | p = 0.019 (*)         |
| 120 pA | PCDH19 + | 10.00  | 1.49  | 11 | PCDH19 + vs. PCDH19 - |
|        | PCDH19 - | 17.44  | 2.19  | 16 | p = 0.019 (*)         |
| 130 pA | PCDH19 + | 10.00  | 1.40  | 11 | PCDH19 + vs. PCDH19 - |
|        | PCDH19 - | 17.69  | 2.22  | 16 | p = 0.019 (*)         |
| 140 pA | PCDH19 + | 9.364  | 1.16  | 11 | PCDH19 + vs. PCDH19 - |
|        | PCDH19 - | 17.75  | 2.36  | 16 | p = 0.019 (*)         |
| 150 pA | PCDH19 + | 9.818  | 1.37  | 11 | PCDH19 + vs. PCDH19 - |
|        | PCDH19 - | 17.50  | 2.20  | 16 | p = 0.019 (*)         |
| 160 pA | PCDH19 + | 8.727  | 1.280 | 11 | PCDH19 + vs. PCDH19 - |
|        | PCDH19 - | 17.125 | 2.219 | 16 | p = 0.019 (*)         |

| <b>Fig. 3c</b>                   |             |            |          |  |                                                              |
|----------------------------------|-------------|------------|----------|--|--------------------------------------------------------------|
| <b>Input resistance<br/>(mΩ)</b> | <b>Mean</b> | <b>SEM</b> | <b>N</b> |  | <b>p value</b><br>(Two – tailed unpaired Student's t – test) |
| PCDH19 +                         | 485.9       | 57.76      | 11       |  | PCDH19 + vs. PCDH19 - p = 0.163 (n.s.)                       |
| PCDH19 -                         | 590.4       | 45.36      | 16       |  |                                                              |
| <b>RMP (mV)</b>                  | <b>Mean</b> | <b>SEM</b> | <b>N</b> |  | <b>p value</b><br>(Two – tailed unpaired Student's t – test) |
| PCDH19 +                         | -68.84      | 2.554      | 11       |  | PCDH19 + vs. PCDH19 - p = 0.001 (**)                         |
| PCDH19 -                         | -57.22      | 1.921      | 16       |  |                                                              |
| <b>Rheobase (pA)</b>             | <b>Mean</b> | <b>SEM</b> | <b>N</b> |  | <b>p value</b><br>(Two – tailed unpaired Student's t – test) |
| PCDH19 +                         | 41.82       | 6.441      | 11       |  | PCDH19 + vs. PCDH19 - p < 0.001 (***)                        |
| PCDH19 -                         | 13.75       | 2.720      | 16       |  |                                                              |

| <b>Fig. 3d</b>                                             |          |             |            |          |                                                          |
|------------------------------------------------------------|----------|-------------|------------|----------|----------------------------------------------------------|
| <b>Instantaneous<br/>frequency (Hz)<br/>at 150 pA step</b> |          | <b>Mean</b> | <b>SEM</b> | <b>N</b> | <b>p value</b><br>(Two – way ANOVA, <i>post hoc</i> FDR) |
| 0.1 sec                                                    | PCDH19 + | 2.45        | 0.41       | 11       | PCDH19 + vs. PCDH19 -<br>p = 0.055 (n.s.)                |
|                                                            | PCDH19 - | 3.313       | 0.25       | 16       |                                                          |
| 0.2 sec                                                    | PCDH19 + | 1.45        | 0.21       | 11       | PCDH19 + vs. PCDH19 -<br>p = 0.055 (n.s.)                |
|                                                            | PCDH19 - | 2.313       | 0.24       | 16       |                                                          |
| 0.3 sec                                                    | PCDH19 + | 1.10        | 0.21       | 11       | PCDH19 + vs. PCDH19 -<br>p = 0.055 (n.s.)                |
|                                                            | PCDH19 - | 1.875       | 0.24       | 16       |                                                          |
| 0.4 sec                                                    | PCDH19 + | 0.91        | 0.25       | 11       | PCDH19 + vs. PCDH19 -<br>p = 0.055 (n.s.)                |
|                                                            | PCDH19 - | 1.688       | 0.30       | 16       |                                                          |
| 0.5 sec                                                    | PCDH19 + | 0.82        | 0.23       | 11       | PCDH19 + vs. PCDH19 -<br>p = 0.078 (n.s.)                |
|                                                            | PCDH19 - | 1.5         | 0.27       | 16       |                                                          |
| 0.6 sec                                                    | PCDH19 + | 0.73        | 0.24       | 11       | PCDH19 + vs. PCDH19 -<br>p = 0.055 (n.s.)                |
|                                                            | PCDH19 - | 1.563       | 0.22       | 16       |                                                          |
| 0.7 sec                                                    | PCDH19 + | 0.73        | 0.19       | 11       | PCDH19 + vs. PCDH19 -<br>p = 0.075 (n.s.)                |
|                                                            | PCDH19 - | 1.438       | 0.26       | 16       |                                                          |
| 0.8 sec                                                    | PCDH19 + | 0.55        | 0.16       | 11       | PCDH19 + vs. PCDH19 -<br>p = 0.055 (n.s.)                |
|                                                            | PCDH19 - | 1.563       | 0.20       | 16       |                                                          |

| 0.9 sec                    | PCDH19 + | 0.73  | 0.19 | 11                                                    | PCDH19 + vs. PCDH19 -<br>p = 0.173 (n.s.) |
|----------------------------|----------|-------|------|-------------------------------------------------------|-------------------------------------------|
|                            | PCDH19 - | 1.25  | 0.28 | 16                                                    |                                           |
| 1.0 sec                    | PCDH19 + | 0.64  | 0.15 | 11                                                    | PCDH19 + vs. PCDH19 -<br>p = 0.185 (n.s.) |
|                            | PCDH19 - | 1.125 | 0.22 | 16                                                    |                                           |
| Exponential<br>decay slope | Mean     | SEM   | N    | p value<br>(Two – tailed unpaired Student’s t – test) |                                           |
| PCDH19 +                   | 5.932    | 1.345 | 8    | PCDH19 + vs. PCDH19 -    p = 0.712 (n.s.)             |                                           |
| PCDH19 -                   | 6.555    | 0.982 | 15   |                                                       |                                           |

| Fig. 3e<br>AP threshold (mV)     | Mean   | SEM   | N  | p value<br>(Two – tailed unpaired Student's t – test) |  |
|----------------------------------|--------|-------|----|-------------------------------------------------------|--|
| PCDH19 +                         | -37.45 | 1.790 | 11 | PCDH19 + vs. PCDH19 - p = 0.578 (n.s.)                |  |
| PCDH19 -                         | -38.88 | 1.698 | 16 |                                                       |  |
| AP amplitude (mV)                | Mean   | SEM   | N  | p value<br>(Two – tailed unpaired Student's t – test) |  |
| PCDH19 +                         | 93.33  | 2.532 | 11 | PCDH19 + vs. PCDH19 - p = 0.921 (n.s.)                |  |
| PCDH19 -                         | 93.69  | 2.498 | 16 |                                                       |  |
| AP half - width (ms)             | Mean   | SEM   | N  | p value<br>(Two – tailed unpaired Student's t – test) |  |
| PCDH19 +                         | 1.282  | 0.042 | 11 | PCDH19 + vs. PCDH19 - p = 0.321 (n.s.)                |  |
| PCDH19 -                         | 1.363  | 0.059 | 16 |                                                       |  |
| AP maximum rise slope (mV / ms)  | Mean   | SEM   | N  | p value<br>(Two – tailed unpaired Student's t – test) |  |
| PCDH19 +                         | 253.9  | 11.65 | 11 | PCDH19 + vs. PCDH19 - p = 0.552 (n.s.)                |  |
| PCDH19 -                         | 240.5  | 16.42 | 16 |                                                       |  |
| AP maximum decay slope (mV / ms) | Mean   | SEM   | N  | p value<br>(Two – tailed unpaired Student's t – test) |  |
| PCDH19 +                         | 67.08  | 2.433 | 11 | PCDH19 + vs. PCDH19 - p = 0.317 (n.s.)                |  |
| PCDH19 -                         | 62.95  | 2.895 | 16 |                                                       |  |

| Fig. 3e<br>fAHP (mV) | Mean  | SEM   | N  | p value<br>(Two – tailed unpaired Student's t – test) |  |
|----------------------|-------|-------|----|-------------------------------------------------------|--|
| PCDH19 +             | 19.45 | 1.565 | 11 | PCDH19 + vs. PCDH19 - p = 0.259 (n.s.)                |  |
| PCDH19 -             | 16.76 | 1.593 | 16 |                                                       |  |

| Fig. 3f | Group | Mean | SEM | N |  |
|---------|-------|------|-----|---|--|
|---------|-------|------|-----|---|--|

| Current density<br>(pA / pF) |          |        |       |    | p value<br>(Two – way ANOVA)            |
|------------------------------|----------|--------|-------|----|-----------------------------------------|
| Outward currents             |          |        |       |    |                                         |
| -75 mV                       | PCDH19 + | 0.000  | 0.000 | 10 | PCDH19 + vs PCDH19 –<br>p > 0.05 (n.s.) |
|                              | PCDH19 - | 0.000  | 0.000 | 15 |                                         |
| -70 mV                       | PCDH19 + | 0.000  | 0.000 | 10 |                                         |
|                              | PCDH19 - | 0.000  | 0.000 | 15 |                                         |
| -65 mV                       | PCDH19 + | 0.000  | 0.000 | 10 |                                         |
|                              | PCDH19 - | 0.000  | 0.000 | 15 |                                         |
| -60 mV                       | PCDH19 + | 0.082  | 0.056 | 10 |                                         |
|                              | PCDH19 - | 0.000  | 0.000 | 15 |                                         |
| -55 mV                       | PCDH19 + | 0.829  | 0.198 | 10 |                                         |
|                              | PCDH19 - | 0.430  | 0.145 | 15 |                                         |
| -50 mV                       | PCDH19 + | 1.392  | 0.253 | 10 |                                         |
|                              | PCDH19 - | 1.825  | 0.487 | 15 |                                         |
| -45 mV                       | PCDH19 + | 2.777  | 0.625 | 10 |                                         |
|                              | PCDH19 - | 3.265  | 0.748 | 15 |                                         |
| -40 mV                       | PCDH19 + | 6.336  | 1.094 | 10 |                                         |
|                              | PCDH19 - | 6.151  | 1.024 | 15 |                                         |
| -35 mV                       | PCDH19 + | 9.056  | 1.375 | 10 |                                         |
|                              | PCDH19 - | 10.729 | 1.242 | 15 |                                         |
| -30 mV                       | PCDH19 + | 12.262 | 1.567 | 10 |                                         |
|                              | PCDH19 - | 14.149 | 1.456 | 15 |                                         |
| -25 mV                       | PCDH19 + | 16.830 | 0.676 | 10 |                                         |
|                              | PCDH19 - | 17.314 | 1.801 | 15 |                                         |
| -20 mV                       | PCDH19 + | 19.869 | 0.834 | 10 |                                         |
|                              | PCDH19 - | 21.535 | 1.663 | 15 |                                         |
| -15 mV                       | PCDH19 + | 23.064 | 1.020 | 10 |                                         |
|                              | PCDH19 - | 25.197 | 1.946 | 15 |                                         |
| -10 mV                       | PCDH19 + | 26.217 | 1.170 | 10 |                                         |
|                              | PCDH19 - | 29.104 | 2.219 | 15 |                                         |
| -5 mV                        | PCDH19 + | 30.018 | 1.486 | 10 |                                         |
|                              | PCDH19 - | 33.277 | 2.457 | 15 |                                         |
| 0 mV                         | PCDH19 + | 34.066 | 1.930 | 10 |                                         |
|                              | PCDH19 - | 38.073 | 2.557 | 15 |                                         |
| 5 mV                         | PCDH19 + | 38.315 | 2.339 | 10 |                                         |
|                              | PCDH19 - | 42.889 | 2.889 | 15 |                                         |
| 10 mV                        | PCDH19 + | 42.707 | 2.707 | 10 |                                         |
|                              | PCDH19 - | 48.457 | 3.186 | 15 |                                         |
| 15 mV                        | PCDH19 + | 47.841 | 3.447 | 10 |                                         |
|                              | PCDH19 - | 53.759 | 3.291 | 15 |                                         |
| 20 mV                        | PCDH19 + | 52.316 | 3.956 | 10 |                                         |
|                              | PCDH19 - | 59.925 | 3.874 | 15 |                                         |
| 25 mV                        | PCDH19 + | 56.975 | 4.486 | 10 |                                         |
|                              | PCDH19 - | 65.502 | 4.207 | 15 |                                         |
| 30 mV                        | PCDH19 + | 62.202 | 5.222 | 10 |                                         |
|                              | PCDH19 - | 72.835 | 4.702 | 15 |                                         |
| 35 mV                        | PCDH19 + | 66.914 | 5.824 | 10 |                                         |
|                              | PCDH19 - | 78.062 | 5.181 | 15 |                                         |
| 40 mV                        | PCDH19 + | 72.206 | 6.444 | 10 |                                         |



|                 |          |          |        |    |                                          |
|-----------------|----------|----------|--------|----|------------------------------------------|
|                 | PCDH19 - | 83.605   | 5.459  | 15 |                                          |
| 45 mV           | PCDH19 + | 77.568   | 7.228  | 10 |                                          |
|                 | PCDH19 - | 89.209   | 5.734  | 15 |                                          |
| 50 mV           | PCDH19 + | 83.616   | 8.138  | 10 |                                          |
|                 | PCDH19 - | 95.693   | 6.314  | 15 |                                          |
| 55 mV           | PCDH19 + | 88.670   | 8.793  | 10 |                                          |
|                 | PCDH19 - | 101.787  | 6.657  | 15 |                                          |
| 60 mV           | PCDH19 + | 94.329   | 9.758  | 10 |                                          |
|                 | PCDH19 - | 113.901  | 7.163  | 15 |                                          |
| 65 mV           | PCDH19 + | 99.941   | 10.518 | 10 |                                          |
|                 | PCDH19 - | 113.901  | 7.646  | 15 |                                          |
| 70 mV           | PCDH19 + | 106.109  | 11.567 | 10 |                                          |
|                 | PCDH19 - | 119.256  | 8.408  | 15 |                                          |
| 75 mV           | PCDH19 + | 111.948  | 12.444 | 10 |                                          |
|                 | PCDH19 - | 124.491  | 9.423  | 15 |                                          |
| Inward currents |          |          |        |    |                                          |
| -75 mV          | PCDH19 + | 0.000    | 0.000  | 10 | PCDH19 + vs. PCDH19 –<br>p > 0.05 (n.s.) |
|                 | PCDH19 - | 0.000    | 0.000  | 14 |                                          |
| -70 mV          | PCDH19 + | 0.000    | 0.000  | 10 |                                          |
|                 | PCDH19 - | 0.000    | 0.000  | 14 |                                          |
| -65 mV          | PCDH19 + | 0.000    | 0.000  | 10 |                                          |
|                 | PCDH19 - | 0.000    | 0.000  | 14 |                                          |
| -60 mV          | PCDH19 + | 0.000    | 0.000  | 10 |                                          |
|                 | PCDH19 - | 0.000    | 0.000  | 14 |                                          |
| -55 mV          | PCDH19 + | 0.000    | 0.000  | 10 |                                          |
|                 | PCDH19 - | -2.239   | 2.239  | 14 |                                          |
| -50 mV          | PCDH19 + | 0.000    | 0.000  | 10 |                                          |
|                 | PCDH19 - | -44.188  | 21.227 | 14 |                                          |
| -45 mV          | PCDH19 + | -27.480  | 17.185 | 10 |                                          |
|                 | PCDH19 - | -58.838  | 20.987 | 14 |                                          |
| -40 mV          | PCDH19 + | -91.611  | 23.809 | 10 |                                          |
|                 | PCDH19 - | -105.529 | 20.436 | 14 |                                          |
| -35 mV          | PCDH19 + | -97.166  | 19.770 | 10 |                                          |
|                 | PCDH19 - | -134.124 | 13.729 | 14 |                                          |
| -30 mV          | PCDH19 + | -101.949 | 18.393 | 10 |                                          |
|                 | PCDH19 - | -135.521 | 10.547 | 14 |                                          |
| -25 mV          | PCDH19 + | -105.352 | 10.806 | 10 |                                          |
|                 | PCDH19 - | -124.244 | 9.983  | 14 |                                          |
| -20 mV          | PCDH19 + | -98.490  | 10.188 | 10 |                                          |
|                 | PCDH19 - | -118.320 | 9.279  | 14 |                                          |
| -15 mV          | PCDH19 + | -91.690  | 9.519  | 10 |                                          |
|                 | PCDH19 - | -110.345 | 8.739  | 14 |                                          |
| -10 mV          | PCDH19 + | -85.054  | 8.738  | 10 |                                          |
|                 | PCDH19 - | -102.623 | 8.218  | 14 |                                          |
| -5 mV           | PCDH19 + | -78.369  | 8.052  | 10 |                                          |
|                 | PCDH19 - | -94.680  | 7.624  | 14 |                                          |
| 0 mV            | PCDH19 + | -71.621  | 7.396  | 10 |                                          |
|                 | PCDH19 - | -86.713  | 7.097  | 14 |                                          |
| 5 mV            | PCDH19 + | -64.995  | 6.580  | 10 |                                          |
|                 | PCDH19 - | -78.600  | 6.521  | 14 |                                          |
| 10 mV           | PCDH19 + | -58.335  | 5.920  | 10 |                                          |
|                 | PCDH19 - | -70.935  | 5.923  | 14 |                                          |

|                         |              |             |            |          |                                                              |
|-------------------------|--------------|-------------|------------|----------|--------------------------------------------------------------|
| 15 mV                   | PCDH19 +     | -51.736     | 5.220      | 10       |                                                              |
|                         | PCDH19 -     | -62.840     | 5.298      | 14       |                                                              |
| 20 mV                   | PCDH19 +     | -45.005     | 4.541      | 10       |                                                              |
|                         | PCDH19 -     | -55.243     | 4.757      | 14       |                                                              |
| 25 mV                   | PCDH19 +     | -38.509     | 3.841      | 10       |                                                              |
|                         | PCDH19 -     | -47.317     | 4.167      | 14       |                                                              |
| 30 mV                   | PCDH19 +     | -31.847     | 3.199      | 10       |                                                              |
|                         | PCDH19 -     | -39.565     | 3.613      | 14       |                                                              |
| 35 mV                   | PCDH19 +     | -25.457     | 2.600      | 10       |                                                              |
|                         | PCDH19 -     | -31.886     | 3.088      | 14       |                                                              |
| 40 mV                   | PCDH19 +     | -19.135     | 2.067      | 10       |                                                              |
|                         | PCDH19 -     | -24.313     | 2.557      | 14       |                                                              |
| 45 mV                   | PCDH19 +     | -12.921     | 1.811      | 10       |                                                              |
|                         | PCDH19 -     | -16.731     | 2.050      | 14       |                                                              |
| 50 mV                   | PCDH19 +     | -6.916      | 1.598      | 10       |                                                              |
|                         | PCDH19 -     | -9.531      | 1.596      | 14       |                                                              |
| 55 mV                   | PCDH19 +     | -2.560      | 0.909      | 10       |                                                              |
|                         | PCDH19 -     | -3.468      | 0.811      | 14       |                                                              |
| 60 mV                   | PCDH19 +     | -0.167      | 0.167      | 10       |                                                              |
|                         | PCDH19 -     | -0.016      | 0.016      | 14       |                                                              |
| 65 mV                   | PCDH19 +     | 0.000       | 0.000      | 10       |                                                              |
|                         | PCDH19 -     | 0.000       | 0.000      | 14       |                                                              |
| 70 mV                   | PCDH19 +     | 0.000       | 0.000      | 10       |                                                              |
|                         | PCDH19 -     | 0.000       | 0.000      | 14       |                                                              |
| 75 mV                   | PCDH19 +     | 0.000       | 0.000      | 10       |                                                              |
|                         | PCDH19 -     | 0.000       | 0.000      | 14       |                                                              |
| <b>Capacitance (pF)</b> |              | <b>Mean</b> | <b>SEM</b> | <b>N</b> | <b>p value</b><br>(Two – tailed unpaired Student’s t – test) |
| Ctrl                    |              | 52.40       | 7.334      | 10       | Ctrl vs Mosaic p = 0.432 (n.s.)                              |
| Mosaic                  |              | 46.29       | 3.803      | 14       |                                                              |
| <b>I / I max</b>        | <b>Group</b> | <b>Mean</b> | <b>SEM</b> | <b>N</b> | <b>p value</b><br>(Two – way ANOVA)                          |
| -60 mV                  | PCDH19 +     | 0.000       | 0.000      | 10       | PCDH19 + vs. PCDH19 –<br>p > 0.05 (n.s.)                     |
|                         | PCDH19 -     | 0.000       | 0.000      | 14       |                                                              |
| -55 mV                  | PCDH19 +     | 0.000       | 0.000      | 10       |                                                              |
|                         | PCDH19 -     | 0.017       | 0.017      | 14       |                                                              |
| -50 mV                  | PCDH19 +     | 0.000       | 0.000      | 10       |                                                              |
|                         | PCDH19 -     | 0.286       | 0.125      | 14       |                                                              |
| -45 mV                  | PCDH19 +     | 0.171       | 0.104      | 10       |                                                              |
|                         | PCDH19 -     | 0.369       | 0.123      | 14       |                                                              |
| -40 mV                  | PCDH19 +     | 0.616       | 0.152      | 10       |                                                              |
|                         | PCDH19 -     | 0.653       | 0.111      | 14       |                                                              |
| -35 mV                  | PCDH19 +     | 0.672       | 0.129      | 10       |                                                              |
|                         | PCDH19 -     | 0.866       | 0.050      | 14       |                                                              |
| -30 mV                  | PCDH19 +     | 0.701       | 0.119      | 10       |                                                              |
|                         | PCDH19 -     | 0.867       | 0.019      | 14       |                                                              |
| -25 mV                  | PCDH19 +     | 0.852       | 0.030      | 10       |                                                              |
|                         | PCDH19 -     | 0.812       | 0.017      | 14       |                                                              |
| <b>I / I max</b>        |              | <b>Mean</b> | <b>SEM</b> | <b>N</b> | <b>p value</b>                                               |

|          |       |       |    |                       |
|----------|-------|-------|----|-----------------------|
|          |       |       |    | (One – sample t test) |
| PCDH19 – | 0.286 | 0.125 | 14 | p = 0.040 (*)         |

| <b>Fig. 3g</b>         |             |            |          |                                                              |
|------------------------|-------------|------------|----------|--------------------------------------------------------------|
| <b>Amplitude (pA)</b>  | <b>Mean</b> | <b>SEM</b> | <b>N</b> | <b>p value</b><br>(Two – tailed unpaired Student’s t – test) |
| Ctrl                   | 9.630       | 0.597      | 10       | Ctrl vs. Mosaic    p = 0.522 (n.s.)                          |
| Mosaic                 | 10.39       | 1.031      | 9        |                                                              |
| <b>Area (pA * ms)</b>  | <b>Mean</b> | <b>SEM</b> | <b>N</b> | <b>p value</b><br>(Two – tailed unpaired Student’s t – test) |
| Ctrl                   | 78.87       | 5.156      | 10       | Ctrl vs. Mosaic    p = 0.964 (n.s.)                          |
| Mosaic                 | 79.36       | 9.624      | 9        |                                                              |
| <b>Decay time (ms)</b> | <b>Mean</b> | <b>SEM</b> | <b>N</b> | <b>p value</b><br>(Two – tailed unpaired Student’s t – test) |
| Ctrl                   | 12.59       | 0.624      | 10       | Ctrl vs. Mosaic    p = 0.191 (n.s.)                          |
| Mosaic                 | 11.42       | 0.580      | 9        |                                                              |
| <b>Frequency (Hz)</b>  | <b>Mean</b> | <b>SEM</b> | <b>N</b> | <b>p value</b><br>(Two – tailed unpaired Student’s t – test) |
| Ctrl                   | 0.372       | 0.043      | 10       | Ctrl vs. Mosaic    p = 0.133 (n.s.)                          |
| Mosaic                 | 0.290       | 0.027      | 9        |                                                              |

| <b>Fig. 3h</b>         |             |            |          |                                                              |
|------------------------|-------------|------------|----------|--------------------------------------------------------------|
| <b>Amplitude (pA)</b>  | <b>Mean</b> | <b>SEM</b> | <b>N</b> | <b>p value</b><br>(Two – tailed unpaired Student’s t – test) |
| Ctrl                   | 9.554       | 0.786      | 13       | Ctrl vs. Mosaic    p = 0.417 (n.s.)                          |
| Mosaic                 | 10.57       | 0.930      | 9        |                                                              |
| <b>Area (pA * ms)</b>  | <b>Mean</b> | <b>SEM</b> | <b>N</b> | <b>p value</b><br>(Two – tailed unpaired Student’s t – test) |
| Ctrl                   | 145.0       | 25.26      | 13       | Ctrl vs. Mosaic    p = 0.897 (n.s.)                          |
| Mosaic                 | 150.3       | 32.58      | 9        |                                                              |
| <b>Decay time (ms)</b> | <b>Mean</b> | <b>SEM</b> | <b>N</b> | <b>p value</b><br>(Two – tailed unpaired Student’s t – test) |
| Ctrl                   | 28.82       | 1.952      | 13       | Ctrl vs. Mosaic    p = 0.595 (n.s.)                          |
| Mosaic                 | 31.64       | 5.682      | 9        |                                                              |
| <b>Frequency (Hz)</b>  | <b>Mean</b> | <b>SEM</b> | <b>N</b> | <b>p value</b><br>(Two – tailed unpaired Student’s t – test) |
| Ctrl                   | 0.500       | 0.933      | 13       | Ctrl vs. Mosaic    p = 0.004 (**)                            |
| Mosaic                 | 0.073       | 0.117      | 9        |                                                              |

**Supplementary table 4. Mean values, SEM, number of samples and p values of data displayed in Figure 4.**

| <b>Fig. 4a</b>           |             |            |          |                                                              |
|--------------------------|-------------|------------|----------|--------------------------------------------------------------|
| <b>MFR (spike / s)</b>   | <b>Mean</b> | <b>SEM</b> | <b>N</b> | <b>p value</b><br>(Two – tailed unpaired Student’s t – test) |
| Ctrl                     | 0.734       | 0.097      | 6        | Ctrl vs. Mosaic    p = 0.029 (*)                             |
| Mosaic                   | 0.485       | 0.013      | 6        |                                                              |
| <b>MBR (burst / min)</b> | <b>Mean</b> | <b>SEM</b> | <b>N</b> | <b>p value</b><br>(Two – tailed unpaired Student’s t – test) |
| Ctrl                     | 3.40        | 0.383      | 6        | Ctrl vs. Mosaic    p = 0.131 (n.s.)                          |
| Mosaic                   | 2.76        | 0.077      | 6        |                                                              |
| <b>MBD (ms)</b>          | <b>Mean</b> | <b>SEM</b> | <b>N</b> | <b>p value</b><br>(Two – tailed unpaired Student’s t – test) |
| Ctrl                     | 83.81       | 9.947      | 6        | Ctrl vs. Mosaic    p = 0.032 (*)                             |
| Mosaic                   | 55.95       | 5.115      | 6        |                                                              |
| <b>SI (a.u.)</b>         | <b>Mean</b> | <b>SEM</b> | <b>N</b> | <b>p value</b><br>(Two – tailed unpaired Student’s t – test) |
| Ctrl                     | 0.243       | 0.007      | 6        | Ctrl vs. Mosaic    p = 0.092 (n.s.)                          |
| Mosaic                   | 0.313       | 0.037      | 6        |                                                              |

| <b>Fig. 4b</b>           |             |            |          |                                                              |
|--------------------------|-------------|------------|----------|--------------------------------------------------------------|
| <b>MFR (spike / s)</b>   | <b>Mean</b> | <b>SEM</b> | <b>N</b> | <b>p value</b><br>(Two – tailed unpaired Student’s t – test) |
| Scrambled                | 5.934       | 1.561      | 8        | Scrambled vs. <i>PCDH19</i> shRNA    p = 0.039 (*)           |
| <i>PCDH19</i> shRNA      | 2.051       | 0.682      | 8        |                                                              |
| <b>MBR (burst / min)</b> | <b>Mean</b> | <b>SEM</b> | <b>N</b> | <b>p value</b><br>(Two – tailed unpaired Student’s t – test) |
| Scrambled                | 6.655       | 0.865      | 8        | Scrambled vs. <i>PCDH19</i> shRNA    p = 0.047 (*)           |
| <i>PCDH19</i> shRNA      | 4.179       | 0.683      | 7        |                                                              |
| <b>MBD (ms)</b>          | <b>Mean</b> | <b>SEM</b> | <b>N</b> | <b>p value</b><br>(Two – tailed unpaired Student’s t – test) |
| Scrambled                | 522.4       | 82.59      | 8        | Scrambled vs. <i>PCDH19</i> shRNA    p = 0.033 (*)           |
| <i>PCDH19</i> shRNA      | 291.8       | 41.85      | 7        |                                                              |

| <b>Fig. 4c</b>         |             |            |          |                                                              |
|------------------------|-------------|------------|----------|--------------------------------------------------------------|
| <b>MFR (spike / s)</b> | <b>Mean</b> | <b>SEM</b> | <b>N</b> | <b>p value</b><br>(Two – tailed unpaired Student’s t – test) |
| Ctrl                   | 0.866       | 0.028      | 14       | Ctrl vs. Mosaic    p < 0.001 (***)                           |
| Mosaic                 | 0.632       | 0.051      | 8        |                                                              |

| <b>MBR<br/>(burst / min)</b> | <b>Mean</b> | <b>SEM</b> | <b>N</b> | <b>p value</b><br>(Two – tailed unpaired Student’s t – test) |
|------------------------------|-------------|------------|----------|--------------------------------------------------------------|
| Ctrl                         | 2.559       | 0.164      | 14       | Ctrl vs. Mosaic $p < 0.001$ (***)                            |
| Mosaic                       | 1.598       | 0.130      | 8        |                                                              |
| <b>MBD (ms)</b>              | <b>Mean</b> | <b>SEM</b> | <b>N</b> | <b>p value</b><br>(Mann – Whitney test)                      |
| Ctrl                         | 81.82       | 4.731      | 14       | Ctrl vs. Mosaic $p = 0.095$ (n.s.)                           |
| Mosaic                       | 100.4       | 13.75      | 8        |                                                              |
| <b>PSB (%)</b>               | <b>Mean</b> | <b>SEM</b> | <b>N</b> | <b>p value</b><br>(Two – tailed unpaired Student’s t – test) |
| Ctrl                         | 12.18       | 1.481      | 14       | Ctrl vs. Mosaic $p = 0.081$ (n.s.)                           |
| Mosaic                       | 28.87       | 7.304      | 8        |                                                              |
| <b>SI (a.u.)</b>             | <b>Mean</b> | <b>SEM</b> | <b>N</b> | <b>p value</b><br>(Mann – Whitney test)                      |
| Ctrl                         | 0.102       | 0.008      | 14       | Ctrl vs. Mosaic $p < 0.001$ (***)                            |
| Mosaic                       | 0.178       | 0.019      | 8        |                                                              |

| <b>Fig. 4c- inset</b>          | <b>Mean</b> | <b>SEM</b> | <b>N</b> | <b>p value</b><br>(Two – tailed unpaired Student’s t – test) |
|--------------------------------|-------------|------------|----------|--------------------------------------------------------------|
| <b>MFR-CA1<br/>(spike / s)</b> |             |            |          |                                                              |
| Ctrl                           | 0.313       | 0.032      | 14       | Ctrl vs. Mosaic $p < 0.001$ (***)                            |
| Mosaic                         | 0.087       | 0.025      | 7        |                                                              |
| <b>MFR-CA3<br/>(spike / s)</b> | <b>Mean</b> | <b>SEM</b> | <b>N</b> | <b>p value</b><br>(Two – tailed unpaired Student’s t – test) |
| Ctrl                           | 0.328       | 0.040      | 14       | Ctrl vs. Mosaic $p < 0.001$ (***)                            |
| Mosaic                         | 0.080       | 0.013      | 7        |                                                              |
| <b>MFR-DG<br/>(spike / s)</b>  | <b>Mean</b> | <b>SEM</b> | <b>N</b> | <b>p value</b><br>(Two – tailed unpaired Student’s t – test) |
| Ctrl                           | 0.307       | 0.034      | 14       | Ctrl vs. Mosaic $p < 0.001$ (***)                            |
| Mosaic                         | 0.098       | 0.017      | 7        |                                                              |

**Supplementary table 5. Mean values, SEM, number of samples and p values of data displayed in Figure 5.**

| <b>Fig. 5b</b>             | <b>Mean</b> | <b>SEM</b> | <b>N</b> | <b>p value</b><br>(Two – tailed unpaired Student’s t – test) |
|----------------------------|-------------|------------|----------|--------------------------------------------------------------|
| <b>MFR<br/>(spike / s)</b> |             |            |          |                                                              |
| Ctrl                       | 55.50       | 9.84       | 20       | Ctrl vs. Mosaic $p = 0.001$ (**)                             |
| Mosaic                     | 32.44       | 4.88       | 28       |                                                              |
| <b>MFR-CA1</b>             | <b>Mean</b> | <b>SEM</b> | <b>N</b> | <b>p value</b>                                               |

| (spike / s)            |       |      |   | (Two – tailed unpaired Student's t – test)            |
|------------------------|-------|------|---|-------------------------------------------------------|
| Ctrl                   | 24.53 | 0.60 | 5 | Ctrl vs. Mosaic $p < 0.05$ (*)                        |
| Mosaic                 | 18.91 | 0.33 | 7 |                                                       |
| MFR-Amy<br>(spike / s) | Mean  | SEM  | N | p value<br>(Two – tailed unpaired Student's t – test) |
| Ctrl                   | 91.87 | 1.37 | 5 | Ctrl vs. Mosaic $p < 0.001$ (***)                     |
| Mosaic                 | 50.69 | 0.36 | 7 |                                                       |
| MFR-ERC<br>(spike / s) | Mean  | SEM  | N | p value<br>(Two – tailed unpaired Student's t – test) |
| Ctrl                   | 87.09 | 2.70 | 5 | Ctrl vs. Mosaic $p < 0.001$ (***)                     |
| Mosaic                 | 47.64 | 1.15 | 7 |                                                       |
| MFR-PRC<br>(spike / s) | Mean  | SEM  | N | p value<br>(Two – tailed unpaired Student's t – test) |
| Ctrl                   | 18.51 | 0.99 | 5 | Ctrl vs. Mosaic $p < 0.05$ (*)                        |
| Mosaic                 | 12.51 | 0.38 | 7 |                                                       |

| Fig. 5d                              |       |      |   |                                                       |
|--------------------------------------|-------|------|---|-------------------------------------------------------|
| Excitatory neurons                   |       |      |   |                                                       |
| Neurons / recording session (n) -CA1 | Mean  | SEM  | N | p value<br>(Two – tailed unpaired Student’s t – test) |
| Ctrl                                 | 25.00 | 0.53 | 5 | Ctrl vs. Mosaic      p = 0.96 (n.s.)                  |
| Mosaic                               | 23.5  | 0.40 | 7 |                                                       |
| Neurons / recording session (n) -Amy | Mean  | SEM  | N | p value<br>(Two – tailed unpaired Student’s t – test) |
| Ctrl                                 | 24.83 | 0.68 | 5 | Ctrl vs. Mosaic      p = 0.94 (n.s.)                  |
| Mosaic                               | 22.67 | 0.36 | 7 |                                                       |
| Neurons / recording session (n) -ERC | Mean  | SEM  | N | p value<br>(Two – tailed unpaired Student’s t – test) |
| Ctrl                                 | 26.50 | 0.31 | 5 | Ctrl vs. Mosaic      p = 0.54 (n.s.)                  |
| Mosaic                               | 21.50 | 0.48 | 7 |                                                       |
| Neurons / recording session (n) -PRC | Mean  | SEM  | N | p value<br>(Two – tailed unpaired Student’s t – test) |
| Ctrl                                 | 23.50 | 0.67 | 5 | Ctrl vs. Mosaic      p = 0.70 (n.s.)                  |
| Mosaic                               | 21.67 | 0.54 | 7 |                                                       |
| Inhibitory neurons                   |       |      |   |                                                       |
|                                      | Mean  | SEM  | N | p value                                               |

|                                      |       |      |   |                                                       |
|--------------------------------------|-------|------|---|-------------------------------------------------------|
| Neurons / recording session (n) -CA1 |       |      |   | (Two – tailed unpaired Student’s t – test)            |
| Ctrl                                 | 11.00 | 0.38 | 5 | Ctrl vs. Mosaic      p = 0.12 (n.s.)                  |
| Mosaic                               | 15.83 | 0.24 | 7 |                                                       |
| Neurons / recording session (n) -Amy | Mean  | SEM  | N | p value<br>(Two – tailed unpaired Student’s t – test) |
| Ctrl                                 | 10.67 | 0.62 | 5 | Ctrl vs. Mosaic      p = 0.45 (n.s.)                  |
| Mosaic                               | 12.16 | 0.59 | 7 |                                                       |
| Neurons / recording session (n) -ERC | Mean  | SEM  | N | p value<br>(Two – tailed unpaired Student’s t – test) |
| Ctrl                                 | 9.67  | 0.57 | 5 | Ctrl vs. Mosaic    p = 0.90 (n.s.)                    |
| Mosaic                               | 11.00 | 0.63 | 7 |                                                       |
| Neurons / recording session (n) -PRC | Mean  | SEM  | N | p value<br>(Two – tailed unpaired Student’s t – test) |
| Ctrl                                 | 10.50 | 0.79 | 5 | Ctrl vs. Mosaic      p = 0.58 (n.s.)                  |
| Mosaic                               | 12.16 | 0.38 | 7 |                                                       |
| E / I ratio                          |       |      |   |                                                       |
| Neurons-CA1 (E / I ratio)            | Mean  | SEM  | N | p value<br>(Two – tailed unpaired Student’s t – test) |
| Ctrl                                 | 2.42  | 0.15 | 5 | Ctrl vs. Mosaic      p = 0.11 (n.s.)                  |
| Mosaic                               | 1.51  | 0.04 | 7 |                                                       |
| Neurons-Amy (E / I ratio)            | Mean  | SEM  | N | p value<br>(Two – tailed unpaired Student’s t – test) |
| Ctrl                                 | 2.60  | 0.20 | 5 | Ctrl vs. Mosaic      p = 0.33 (n.s.)                  |
| Mosaic                               | 1.94  | 0.06 | 7 |                                                       |
| Neurons-ERC (E / I ratio)            | Mean  | SEM  | N | p value<br>(Two – tailed unpaired Student’s t – test) |
| Ctrl                                 | 2.96  | 0.13 | 5 | Ctrl vs. Mosaic    p = 0.27 (n.s.)                    |
| Mosaic                               | 2.20  | 0.16 | 7 |                                                       |
| Neurons-PRC (E / I ratio)            | Mean  | SEM  | N | p value<br>(Two – tailed unpaired Student’s t – test) |
| Ctrl                                 | 2.68  | 0.22 | 5 | Ctrl vs. Mosaic      p = 0.19 (n.s.)                  |
| Mosaic                               | 1.86  | 0.10 | 7 |                                                       |

|                           |
|---------------------------|
| <b>Fig. 5e</b>            |
| <b>Excitatory neurons</b> |
|                           |

| MFR-CA1<br>(spike / s)     | Mean  | SEM  | N | p value<br>(Two – tailed unpaired Student’s t – test) |                 |
|----------------------------|-------|------|---|-------------------------------------------------------|-----------------|
| Ctrl                       | 12.16 | 0.22 | 5 | Ctrl vs. Mosaic                                       | p = 0.03 (*)    |
| Mosaic                     | 6.79  | 0.47 | 7 |                                                       |                 |
| MFR-Amy<br>(spike / s)     | Mean  | SEM  | N | p value<br>(Two – tailed unpaired Student’s t – test) |                 |
| Ctrl                       | 42.21 | 0.59 | 5 | Ctrl vs. Mosaic                                       | p < 0.001 (***) |
| Mosaic                     | 32.02 | 0.53 | 7 |                                                       |                 |
| MFR-ERC<br>(spike / s)     | Mean  | SEM  | N | p value<br>(Two – tailed unpaired Student’s t – test) |                 |
| Ctrl                       | 40.41 | 0.49 | 5 | Ctrl vs. Mosaic                                       | p < 0.001 (***) |
| Mosaic                     | 29.36 | 0.35 | 7 |                                                       |                 |
| MFR-PRC<br>(spike / s)     | Mean  | SEM  | N | p value<br>(Two – tailed unpaired Student’s t – test) |                 |
| Ctrl                       | 15.14 | 0.46 | 5 | Ctrl vs. Mosaic                                       | p = 0.01 (*)    |
| Mosaic                     | 10.14 | 0.32 | 7 |                                                       |                 |
| Inhibitory neurons         |       |      |   |                                                       |                 |
| Neurons-CA1<br>(spike / s) | Mean  | SEM  | N | p value<br>(Two – tailed unpaired Student’s t – test) |                 |
| Ctrl                       | 33.34 | 0.37 | 5 | Ctrl vs. Mosaic                                       | p = 0.02 (*)    |
| Mosaic                     | 49.35 | 1.34 | 7 |                                                       |                 |
| Neurons-Amy<br>(spike / s) | Mean  | SEM  | N | p value<br>(Two – tailed unpaired Student’s t – test) |                 |
| Ctrl                       | 66.57 | 0.90 | 5 | Ctrl vs. Mosaic                                       | p = 0.03 (*)    |
| Mosaic                     | 81.59 | 1.64 | 7 |                                                       |                 |
| Neurons-ERC<br>(spike / s) | Mean  | SEM  | N | p value<br>(Two – tailed unpaired Student’s t – test) |                 |
| Ctrl                       | 68.09 | 0.14 | 5 | Ctrl vs. Mosaic                                       | p = 0.003 (**)  |
| Mosaic                     | 86.34 | 1.87 | 7 |                                                       |                 |
| Neurons-PRC<br>(spike / s) | Mean  | SEM  | N | p value<br>(Two – tailed unpaired Student’s t – test) |                 |
| Ctrl                       | 27.10 | 0.38 | 5 | Ctrl vs. Mosaic                                       | p = 0.92 (n.s)  |
| Mosaic                     | 32.31 | 1.81 | 7 |                                                       |                 |
| E / I ratio                |       |      |   |                                                       |                 |
| Neurons-CA1                | Mean  | SEM  | N | p value                                               |                 |



| (spike / s)                |      |       |   | (Two – tailed unpaired Student's t – test)            |
|----------------------------|------|-------|---|-------------------------------------------------------|
| Ctrl                       | 0.36 | 0.007 | 5 | Ctrl vs. Mosaic $p < 0.001$ (***)                     |
| Mosaic                     | 0.14 | 0.010 | 7 |                                                       |
| Neurons-Amy<br>(spike / s) | Mean | SEM   | N | p value<br>(Two – tailed unpaired Student's t – test) |
| Ctrl                       | 0.64 | 0.012 | 5 | Ctrl vs. Mosaic $p < 0.001$ (***)                     |
| Mosaic                     | 0.39 | 0.009 | 7 |                                                       |
| Neurons-ERC<br>(spike / s) | Mean | SEM   | N | p value<br>(Two – tailed unpaired Student's t – test) |
| Ctrl                       | 0.59 | 0.007 | 5 | Ctrl vs. Mosaic $p < 0.001$ (***)                     |
| Mosaic                     | 0.34 | 0.004 | 7 |                                                       |
| Neurons-PRC<br>(spike / s) | Mean | SEM   | N | p value<br>(Two – tailed unpaired Student's t – test) |
| Ctrl                       | 0.56 | 0.021 | 5 | Ctrl vs. Mosaic $p < 0.001$ (***)                     |
| Mosaic                     | 0.33 | 0.013 | 7 |                                                       |

**Supplementary table 6. Mean values, SEM, number of samples and p values of data displayed in Figure 6.**

| Fig. 6b<br>LFP SI (a.u.) | Mean  | SEM   | N  | p value<br>(Two – tailed unpaired Student's t – test) |
|--------------------------|-------|-------|----|-------------------------------------------------------|
| Ctrl                     | 0.485 | 0.006 | 20 | Ctrl vs. Mosaic $p < 0.001$ (***)                     |
| Mosaic                   | 0.552 | 0.005 | 28 |                                                       |
| LFP SI-CA1<br>(a.u.)     | Mean  | SEM   | N  | p value<br>(Two – tailed unpaired Student's t – test) |
| Ctrl                     | 0.500 | 0.011 | 5  | Ctrl vs. Mosaic $p = 0.03$ (*)                        |
| Mosaic                   | 0.567 | 0.006 | 7  |                                                       |
| LFP SI-Amy<br>(a.u.)     | Mean  | SEM   | N  | p value<br>(Two – tailed unpaired Student's t – test) |
| Ctrl                     | 0.461 | 0.015 | 5  | Ctrl vs. Mosaic $p < 0.001$ (***)                     |
| Mosaic                   | 0.540 | 0.014 | 7  |                                                       |
| LFP SI-ERC<br>(a.u.)     | Mean  | SEM   | N  | p value<br>(Two – tailed unpaired Student's t – test) |
| Ctrl                     | 0.496 | 0.009 | 5  | Ctrl vs. Mosaic $p = 0.02$ (*)                        |
| Mosaic                   | 0.551 | 0.006 | 7  |                                                       |
| LFP SI-PRC<br>(a.u.)     | Mean  | SEM   | N  | p value<br>(Two – tailed unpaired Student's t – test) |

|        |       |       |   |                                   |
|--------|-------|-------|---|-----------------------------------|
| Ctrl   | 0.486 | 0.010 | 5 | Ctrl vs. Mosaic $p < 0.001$ (***) |
| Mosaic | 0.562 | 0.012 | 7 |                                   |

| Fig. 6c                              |      |      |   |                                                       |
|--------------------------------------|------|------|---|-------------------------------------------------------|
| $\alpha$ -bands                      |      |      |   |                                                       |
| Power spectral density (dB / Hz) CA1 | Mean | SEM  | N | p value<br>(Two – tailed unpaired Student’s t – test) |
| Ctrl                                 | 0.37 | 0.02 | 5 | Ctrl vs. Mosaic      p = 0.344 (n.s.)                 |
| Mosaic                               | 0.29 | 0.02 | 7 |                                                       |
| Power spectral density (dB / Hz) Amy | Mean | SEM  | N | p value<br>(Two – tailed unpaired Student’s t – test) |
| Ctrl                                 | 3.11 | 0.56 | 5 | Ctrl vs. Mosaic      p = 0.062 (n.s.)                 |
| Mosaic                               | 3.67 | 0.49 | 7 |                                                       |
| Power spectral density (dB / Hz) ERC | Mean | SEM  | N | p value<br>(Two – tailed unpaired Student’s t – test) |
| Ctrl                                 | 0.72 | 0.05 | 5 | Ctrl vs. Mosaic      p = 0.175 (n.s.)                 |
| Mosaic                               | 1.28 | 0.16 | 7 |                                                       |
| Power spectral density (dB / Hz) PRC | Mean | SEM  | N | p value<br>(Two – tailed unpaired Student’s t – test) |
| Ctrl                                 | 0.24 | 0.01 | 5 | Ctrl vs. Mosaic      p = 0.029 (*)                    |
| Mosaic                               | 0.35 | 0.03 | 7 |                                                       |
| $\beta$ -bands                       |      |      |   |                                                       |
| Power spectral density (dB / Hz) CA1 | Mean | SEM  | N | p value<br>(Two – tailed unpaired Student’s t – test) |
| Ctrl                                 | 0.03 | 0.00 | 5 | Ctrl vs. Mosaic      p = 0.118 (n.s.)                 |
| Mosaic                               | 0.05 | 0.00 | 7 |                                                       |
| Power spectral density (dB / Hz) Amy | Mean | SEM  | N | p value<br>(Two – tailed unpaired Student’s t – test) |

|                                             |             |            |          |                                                              |
|---------------------------------------------|-------------|------------|----------|--------------------------------------------------------------|
| Ctrl                                        | 0.31        | 0.05       | 5        | Ctrl vs. Mosaic    p = 0.071 (n.s.)                          |
| Mosaic                                      | 0.39        | 0.04       | 7        |                                                              |
| <b>Power spectral density (dB / Hz) ERC</b> | <b>Mean</b> | <b>SEM</b> | <b>N</b> | <b>p value</b><br>(Two – tailed unpaired Student’s t – test) |
| Ctrl                                        | 0.09        | 0.01       | 5        | Ctrl vs. Mosaic    p < 0.001 (***)                           |
| Mosaic                                      | 0.13        | 0.01       | 7        |                                                              |
| <b>Power spectral density (dB / Hz) PRC</b> | <b>Mean</b> | <b>SEM</b> | <b>N</b> | <b>p value</b><br>(Two – tailed unpaired Student’s t – test) |
| Ctrl                                        | 0.02        | 0.00       | 5        | Ctrl vs. Mosaic    p = 0.006 (**)                            |
| Mosaic                                      | 0.04        | 0.00       | 7        |                                                              |
| <b>γ-bands</b>                              |             |            |          |                                                              |
| <b>Power spectral density (dB / Hz) CA1</b> | <b>Mean</b> | <b>SEM</b> | <b>N</b> | <b>p value</b><br>(Two – tailed unpaired Student’s t – test) |
| Ctrl                                        | 0.002       | 0.00       | 5        | Ctrl vs. Mosaic    p = 0.002 (**)                            |
| Mosaic                                      | 0.005       | 0.00       | 7        |                                                              |
| <b>Power spectral density (dB / Hz) Amy</b> | <b>Mean</b> | <b>SEM</b> | <b>N</b> | <b>p value</b><br>(Two – tailed unpaired Student’s t – test) |
| Ctrl                                        | 0.02        | 0.00       | 5        | Ctrl vs. Mosaic    p = 0.053                                 |
| Mosaic                                      | 0.04        | 0.00       | 7        |                                                              |
| <b>Power spectral density (dB / Hz) ERC</b> | <b>Mean</b> | <b>SEM</b> | <b>N</b> | <b>p value</b><br>(Two – tailed unpaired Student’s t – test) |
| Ctrl                                        | 0.00        | 0.00       | 5        | Ctrl vs. Mosaic    p < 0.001 (***)                           |
| Mosaic                                      | 0.02        | 0.00       | 7        |                                                              |
| <b>Power spectral density (dB / Hz) PRC</b> | <b>Mean</b> | <b>SEM</b> | <b>N</b> | <b>p value</b><br>(Two – tailed unpaired Student’s t – test) |
| Ctrl                                        | 0.001       | 0.00       | 5        | Ctrl vs. Mosaic    p < 0.001 (***)                           |
| Mosaic                                      | 0.003       | 0.00       | 7        |                                                              |

**Supplementary table 7. Mean values, SEM, number of samples and p values of data displayed in Supplementary Figure 1.**

| Suppl. Fig. 1a |       |       |   |                                                                                                      |
|----------------|-------|-------|---|------------------------------------------------------------------------------------------------------|
| Fold change    | Mean  | SEM   | N | p value<br>(Two – tailed unpaired Student's t – test)                                                |
| Ctrl           | 1.000 | 0.000 | 3 | Ctrl vs E 1 – 2 p < 0.001 (***)<br>Ctrl vs E 4 – 5 p = 0.007 (**)<br>Ctrl vs E 5 – 6 p < 0.001 (***) |
| E 1 – 2        | 0.013 | 0.001 | 3 |                                                                                                      |
| E 4 – 5        | 0.170 | 0.036 | 3 |                                                                                                      |
| E 5 – 6        | 0.092 | 0.006 | 3 |                                                                                                      |

**Supplementary table 8. Mean values, SEM and number of samples of data displayed in Supplementary Figure 2.**

| Suppl. Fig. 2b                      |       |       |    |
|-------------------------------------|-------|-------|----|
| PCDH19 – PSD95<br>colocalization    | Mean  | SEM   | N  |
| R                                   | 0.757 | 0.009 | 13 |
| M1                                  | 0.444 | 0.033 | 13 |
| M2                                  | 0.432 | 0.025 | 13 |
| PCDH19 –<br>VGLUT<br>colocalization | Mean  | SEM   | N  |
| R                                   | 0.907 | 0.009 | 13 |
| M1                                  | 0.726 | 0.021 | 13 |
| M2                                  | 0.749 | 0.016 | 13 |

| Suppl. Fig. 2c                   |       |       |    |
|----------------------------------|-------|-------|----|
| PCDH19 – beta3<br>colocalization | Mean  | SEM   | N  |
| R                                | 0.684 | 0.017 | 15 |
| M1                               | 0.280 | 0.017 | 15 |
| M2                               | 0.381 | 0.020 | 15 |
| PCDH19 – VGAT<br>colocalization  | Mean  | SEM   | N  |
| R                                | 0.748 | 0.026 | 15 |
| M1                               | 0.529 | 0.039 | 15 |
| M2                               | 0.666 | 0.030 | 15 |

**Supplementary table 9. Mean values, SEM, number of samples and p values of data displayed in Supplementary Figure 3.**

| Suppl. Fig. 3c |      |     |   |         |
|----------------|------|-----|---|---------|
| PCDH19 / GAPDH | Mean | SEM | N | p value |

|                                |       |       |   | (One – way ANOVA) |
|--------------------------------|-------|-------|---|-------------------|
| WT                             | 1.787 | 0.439 | 5 | p > 0.05 (n.s.)   |
| <i>Pcdh19</i> <sup>fl/x</sup>  | 1.082 | 0.223 | 5 |                   |
| <i>Pcdh19</i> <sup>fl/fl</sup> | 2.245 | 0.689 | 5 |                   |

**Supplementary table 10. Mean values, SEM, number of samples and p values of data displayed in Supplementary Figure 4.**

| Suppl. Fig. 4a<br>PCDH19 / tubulin | Mean  | SEM   | N | p value<br>(Two – tailed unpaired Student's t – test) |
|------------------------------------|-------|-------|---|-------------------------------------------------------|
| Ctrl                               | 0.971 | 0.067 | 3 | Ctrl vs Mosaic p = 0.019 (*)                          |
| Mosaic                             | 0.548 | 0.088 | 3 |                                                       |

| Suppl. Fig. 4c<br>Synaptic density<br>(N / $\mu\text{m}^3$ ) | Mean  | SEM   | N   | p value<br>(Two – tailed unpaired Student's t – test) |
|--------------------------------------------------------------|-------|-------|-----|-------------------------------------------------------|
| PCDH19 +                                                     | 2.227 | 0.207 | 18  | PCDH19 + vs. PCDH19 - p = 0.015 (*)                   |
| PCDH19 -                                                     | 1.494 | 0.112 | 16  |                                                       |
| PSD thickness<br>(nm)                                        | Mean  | SEM   | N   | p value<br>(Mann – Whitney test)                      |
| PCDH19 +                                                     | 47.44 | 1.048 | 113 | PCDH19 + vs. PCDH19 - p = 0.017 (*)                   |
| PCDH19 -                                                     | 43.58 | 1.011 | 106 |                                                       |
| PSD length (nm)                                              | Mean  | SEM   | N   | p value<br>(Mann – Whitney test)                      |
| PCDH19 +                                                     | 259.8 | 7.199 | 114 | PCDH19 + vs. PCDH19 - p = 0.224 (n.s.)                |
| PCDH19 -                                                     | 265.5 | 6.942 | 108 |                                                       |
| SAL<br>(nm)                                                  | Mean  | SEM   | N   | p value<br>(Mann – Whitney test)                      |
| PCDH19 +                                                     | 328.7 | 11.79 | 114 | PCDH19 + vs. PCDH19 - p = 0.413 (n.s.)                |
| PCDH19 -                                                     | 313.9 | 11.02 | 108 |                                                       |
| Spine head area<br>( $\mu\text{m}^2$ )                       | Mean  | SEM   | N   | p value<br>(Mann – Whitney test)                      |
| PCDH19 +                                                     | 0.118 | 0.006 | 99  | PCDH19 + vs. PCDH19 - p = 0.042 (*)                   |
| PCDH19 -                                                     | 0.099 | 0.005 | 98  |                                                       |
| Presynaptic area<br>( $\mu\text{m}^2$ )                      | Mean  | SEM   | N   | p value<br>(Mann – Whitney test)                      |
| PCDH19 +                                                     | 0.187 | 0.010 | 97  | PCDH19 + vs. PCDH19 - p = 0.422 (n.s.)                |
| PCDH19 -                                                     | 0.177 | 0.011 | 80  |                                                       |
| Vesicle density                                              | Mean  | SEM   | N   | p value                                               |

| (N / $\mu\text{m}^2$ ) |       |       |     | (Mann – Whitney test)                 |
|------------------------|-------|-------|-----|---------------------------------------|
| PCDH19 +               | 335.8 | 12.83 | 101 | PCDH19 + vs. PCDH19 - p < 0.001 (***) |
| PCDH19 -               | 232.5 | 8.509 | 94  |                                       |

| <b>Suppl. Fig. 4d</b><br>Distribution of PSD thickness (nm) | PCDH19 +, % | PCDH19 -, % | p value<br>(Comparison of Z-score, Mann-Whitney test) |
|-------------------------------------------------------------|-------------|-------------|-------------------------------------------------------|
| 10                                                          | 0.00        | 0.00        | PCDH19 + vs. PCDH19 –<br>p = 0.974 (ns)               |
| 20                                                          | 0.88        | 1.85        |                                                       |
| 30                                                          | 8.77        | 21.30       |                                                       |
| 40                                                          | 32.46       | 28.70       |                                                       |
| 50                                                          | 35.96       | 34.26       |                                                       |
| 60                                                          | 14.04       | 10.19       |                                                       |
| 70                                                          | 4.39        | 0.93        |                                                       |
| 80                                                          | 2.63        | 0.93        |                                                       |
| 90                                                          | 0.00        | 0.00        |                                                       |
| 100                                                         | 0.00        | 0.93        |                                                       |
| 110                                                         | 0.00        | 0.00        |                                                       |
| 120                                                         | 0.88        | 0.00        |                                                       |
| 130                                                         | 0.00        | 0.00        |                                                       |
| 140                                                         | 0.00        | 0.00        |                                                       |
| 150                                                         | 0.00        | 0.00        |                                                       |
| 160                                                         | 0.00        | 0.00        |                                                       |
| 170                                                         | 0.00        | 0.93        |                                                       |
| Distribution of vesicle density (N / $\mu\text{m}^2$ )      | PCDH19 +, % | PCDH19 -, % | p value<br>(Comparison of Z-score, Mann-Whitney test) |
| 50                                                          | 0           | 0           | PCDH19 + vs. PCDH19 –<br>p = 0.783 (ns)               |
| 100                                                         | 0           | 7.45        |                                                       |
| 150                                                         | 0           | 13.83       |                                                       |
| 200                                                         | 13.86       | 31.91       |                                                       |
| 250                                                         | 20.79       | 25.53       |                                                       |
| 300                                                         | 18.82       | 11.70       |                                                       |
| 350                                                         | 20.79       | 3.19        |                                                       |
| 400                                                         | 8.91        | 2.13        |                                                       |
| 450                                                         | 5.94        | 3.19        |                                                       |
| 500                                                         | 4.95        | 1.064       |                                                       |
| 550                                                         | 2.97        | 0           |                                                       |
| 600                                                         | 0.99        | 0           |                                                       |
| 650                                                         | 0           | 0           |                                                       |
| 700                                                         | 0           | 0           |                                                       |
| 750                                                         | 0           | 0           |                                                       |
| 800                                                         | 0.99        | 0           |                                                       |
| 850                                                         | 0           | 0           |                                                       |
| 900                                                         | 0           | 0           |                                                       |
| 950                                                         | 0           | 0           |                                                       |

|      |      |   |  |
|------|------|---|--|
| 1000 | 0    | 0 |  |
| 1050 | 0.99 | 0 |  |
| 1100 | 0    | 0 |  |

**Supplementary table 11. Mean values, SEM, number of samples and p values of data displayed in Supplementary Figure 5.**

| <b>Suppl. Fig. 5a</b>        |             |            |          |                                                              |
|------------------------------|-------------|------------|----------|--------------------------------------------------------------|
| <b>MFR<br/>(spike / s)</b>   | <b>Mean</b> | <b>SEM</b> | <b>N</b> | <b>p value</b><br>(Two – tailed unpaired Student’s t – test) |
| Ctrl                         | 0.615       | 0.055      | 8        | Ctrl vs. Mosaic    p = 0.036 (*)                             |
| Mosaic                       | 0.448       | 0.035      | 6        |                                                              |
| <b>MBR<br/>(burst / min)</b> | <b>Mean</b> | <b>SEM</b> | <b>N</b> | <b>p value</b><br>(Two – tailed unpaired Student’s t – test) |
| Ctrl                         | 1.889       | 0.131      | 8        | Ctrl vs. Mosaic    p < 0.001 (***)                           |
| Mosaic                       | 0.912       | 0.141      | 6        |                                                              |
| <b>MBD (ms)</b>              | <b>Mean</b> | <b>SEM</b> | <b>N</b> | <b>p value</b><br>(Two – tailed unpaired Student’s t – test) |
| Ctrl                         | 78.52       | 7.386      | 8        | Ctrl vs. Mosaic    p = 0.282 (n.s.)                          |
| Mosaic                       | 93.55       | 0.141      | 6        |                                                              |
| <b>PSB (%)</b>               | <b>Mean</b> | <b>SEM</b> | <b>N</b> | <b>p value</b><br>(Two – tailed unpaired Student’s t – test) |
| Ctrl                         | 19.33       | 2.874      | 8        | Ctrl vs. Mosaic    p = 0.455 (n.s.)                          |
| Mosaic                       | 14.76       | 1.413      | 6        |                                                              |
| <b>SI (a.u.)</b>             | <b>Mean</b> | <b>SEM</b> | <b>N</b> | <b>p value</b><br>(Two – tailed unpaired Student’s t – test) |
| Ctrl                         | 0.164       | 0.008      | 8        | Ctrl vs. Mosaic    p = 0.011 (*)                             |
| Mosaic                       | 0.220       | 0.018      | 6        |                                                              |

| <b>Suppl. Fig. 5a-<br/>inset</b> |             |            |          |                                                              |
|----------------------------------|-------------|------------|----------|--------------------------------------------------------------|
| <b>MFR-CA1<br/>(spike / s)</b>   | <b>Mean</b> | <b>SEM</b> | <b>N</b> | <b>p value</b><br>(Two – tailed unpaired Student’s t – test) |
| Ctrl                             | 0.101       | 0.019      | 7        | Ctrl vs. Mosaic    p = 0.059 (n.s.)                          |
| Mosaic                           | 0.048       | 0.013      | 6        |                                                              |
| <b>MFR-CA3<br/>(spike / s)</b>   | <b>Mean</b> | <b>SEM</b> | <b>N</b> | <b>p value</b><br>(Two – tailed unpaired Student’s t – test) |
| Ctrl                             | 0.086       | 0.015      | 8        | Ctrl vs. Mosaic    p = 0.276 (n.s.)                          |
| Mosaic                           | 0.060       | 0.016      | 6        |                                                              |
| <b>MFR-DG<br/>(spike / s)</b>    | <b>Mean</b> | <b>SEM</b> | <b>N</b> | <b>p value</b><br>(Two – tailed unpaired Student’s t – test) |

|        |       |       |   |                                  |
|--------|-------|-------|---|----------------------------------|
| Ctrl   | 0.081 | 0.009 | 8 | Ctrl vs. Mosaic    p = 0.047 (*) |
| Mosaic | 0.050 | 0.010 | 6 |                                  |

| <b>Suppl. Fig.5b</b>         |             |            |          |                                                              |
|------------------------------|-------------|------------|----------|--------------------------------------------------------------|
| <b>MFR<br/>(spike / s)</b>   | <b>Mean</b> | <b>SEM</b> | <b>N</b> | <b>p value</b><br>(Two – tailed unpaired Student’s t – test) |
| Ctrl                         | 0.803       | 0.057      | 5        | Ctrl vs. Mosaic    p = 0.015 (*)                             |
| Mosaic                       | 0.448       | 0.035      | 5        |                                                              |
| <b>MBR<br/>(burst / min)</b> | <b>Mean</b> | <b>SEM</b> | <b>N</b> | <b>p value</b><br>(Two – tailed unpaired Student’s t – test) |
| Ctrl                         | 1.699       | 0.166      | 5        | Ctrl vs. Mosaic    p = 0.047 (*)                             |
| Mosaic                       | 1.020       | 0.238      | 5        |                                                              |
| <b>MBD (ms)</b>              | <b>Mean</b> | <b>SEM</b> | <b>N</b> | <b>p value</b><br>(Two – tailed unpaired Student’s t – test) |
| Ctrl                         | 77.80       | 3.334      | 5        | Ctrl vs. Mosaic    p = 0.976 (n.s.)                          |
| Mosaic                       | 78.41       | 20.07      | 5        |                                                              |
| <b>PSB (%)</b>               | <b>Mean</b> | <b>SEM</b> | <b>N</b> | <b>p value</b><br>(Two – tailed unpaired Student’s t – test) |
| Ctrl                         | 11.26       | 1.690      | 5        | Ctrl vs. Mosaic    p = 0.336 (n.s.)                          |
| Mosaic                       | 16.01       | 4.334      | 5        |                                                              |
| <b>SI (a.u.)</b>             | <b>Mean</b> | <b>SEM</b> | <b>N</b> | <b>p value</b><br>(Two – tailed unpaired Student’s t – test) |
| Ctrl                         | 0.101       | 0.009      | 5        | Ctrl vs. Mosaic    p = 0.001 (**)                            |
| Mosaic                       | 0.153       | 0.005      | 5        |                                                              |

| <b>Suppl. Fig. 5b-<br/>inset</b> |             |            |          |                                                              |
|----------------------------------|-------------|------------|----------|--------------------------------------------------------------|
| <b>MFR-CA1<br/>(spike / s)</b>   | <b>Mean</b> | <b>SEM</b> | <b>N</b> | <b>p value</b><br>(Two – tailed unpaired Student’s t – test) |
| Ctrl                             | 0.244       | 0.056      | 5        | Ctrl vs. Mosaic    p = 0.046 (*)                             |
| Mosaic                           | 0.100       | 0.023      | 5        |                                                              |
| <b>MFR-CA3<br/>(spike / s)</b>   | <b>Mean</b> | <b>SEM</b> | <b>N</b> | <b>p value</b><br>(Two – tailed unpaired Student’s t – test) |
| Ctrl                             | 0.284       | 0.047      | 5        | Ctrl vs. Mosaic    p = 0.002 (**)                            |
| Mosaic                           | 0.078       | 0.009      | 5        |                                                              |
| <b>MFR-DG<br/>(spike / s)</b>    | <b>Mean</b> | <b>SEM</b> | <b>N</b> | <b>p value</b><br>(Two – tailed unpaired Student’s t – test) |
| Ctrl                             | 0.320       | 0.102      | 5        | Ctrl vs. Mosaic    p = 0.049 (*)                             |
| Mosaic                           | 0.083       | 0.012      | 5        |                                                              |



**Supplementary table 12. Mean values, SEM, number of samples and p values of data displayed in Supplementary Figure 7.**

| <b>Suppl. Fig. 7a</b>         |             |            |          |                                                              |
|-------------------------------|-------------|------------|----------|--------------------------------------------------------------|
| <b>PCDH19 mRNA expression</b> | <b>Mean</b> | <b>SEM</b> | <b>N</b> | <b>p value</b><br>(Two – tailed unpaired Student’s t – test) |
| Ctrl (Cortex)                 | 10.16       | 1.151      | 4        | Ctrl vs. Mosaic p = 0.019 (*)                                |
| Mosaic (Cortex)               | 3.24        | 1.802      | 3        |                                                              |
| Ctrl (Hippocampus)            | 11.74       | 0.735      | 5        | Ctrl vs. Mosaic p = 0.001 (**)                               |
| Mosaic (Hippocampus)          | 4.339       | 1.229      | 3        |                                                              |

| <b>Suppl. Fig. 7b</b> |             |            |          |                                                              |
|-----------------------|-------------|------------|----------|--------------------------------------------------------------|
| <b>PCDH19 / GAPDH</b> | <b>Mean</b> | <b>SEM</b> | <b>N</b> | <b>p value</b><br>(Two – tailed unpaired Student’s t – test) |
| Ctrl (Cortex)         | 0.999       | 0.097      | 8        | Ctrl vs. Mosaic p < 0.001 (***)                              |
| Mosaic (Cortex)       | 0.393       | 0.069      | 9        |                                                              |
| Ctrl (Hippocampus)    | 1.000       | 0.067      | 6        | Ctrl vs. Mosaic p < 0.001 (***)                              |
| Mosaic (Hippocampus)  | 0.393       | 0.041      | 7        |                                                              |

| <b>Suppl. Fig. 7d</b>         |             |            |          |                                     |
|-------------------------------|-------------|------------|----------|-------------------------------------|
| <b>PCDH19 / GAPDH</b>         | <b>Mean</b> | <b>SEM</b> | <b>N</b> | <b>p value</b><br>(One – way ANOVA) |
| WT                            | 1.896       | 0.508      | 7        | p > 0.05 (n.s.)                     |
| <i>Pcdh19</i> <sup>fl/y</sup> | 1.442       | 0.209      | 6        |                                     |
| Syn1-Cre                      | 2.343       | 0.710      | 6        |                                     |

**Supplementary table 13. Mean values, SEM, number of samples and p values of data displayed in Supplementary Figure 8.**

| <b>Suppl. Fig. 8</b>                        |             |            |          |                                                              |
|---------------------------------------------|-------------|------------|----------|--------------------------------------------------------------|
| <b>δ-bands</b>                              |             |            |          |                                                              |
| <b>Power spectral density (dB / Hz) CA1</b> | <b>Mean</b> | <b>SEM</b> | <b>N</b> | <b>p value</b><br>(Two – tailed unpaired Student’s t – test) |
| Ctrl                                        | 1.69        | 0.14       | 5        | Ctrl vs. Mosaic p = 0.999 (n.s.)                             |
| Mosaic                                      | 1.56        | 0.15       | 7        |                                                              |
| <b>Power spectral density (dB / Hz) Amy</b> | <b>Mean</b> | <b>SEM</b> | <b>N</b> | <b>p value</b><br>(Two – tailed unpaired Student’s t – test) |
| Ctrl                                        | 14.88       | 3.22       | 5        | Ctrl vs. Mosaic p = 0.999 (n.s.)                             |
| Mosaic                                      | 14.44       | 2.93       | 7        |                                                              |

| Power spectral density<br>(dB / Hz)<br>ERC | Mean | SEM  | N | p value<br>(Two – tailed unpaired Student’s t – test) |
|--------------------------------------------|------|------|---|-------------------------------------------------------|
| Ctrl                                       | 3.33 | 0.61 | 5 | Ctrl vs. Mosaic    p = 0.990 (n.s.)                   |
| Mosaic                                     | 2.09 | 0.53 | 7 |                                                       |
| Power spectral density<br>(dB / Hz)<br>PRC | Mean | SEM  | N | p value<br>(Two – tailed unpaired Student’s t – test) |
| Ctrl                                       | 1.85 | 0.09 | 5 | Ctrl vs. Mosaic    p = 0.999 (n.s.)                   |
| Mosaic                                     | 1.20 | 0.07 | 7 |                                                       |
| θ-bands                                    |      |      |   |                                                       |
| Power spectral density<br>(dB / Hz)<br>CA1 | Mean | SEM  | N | p value<br>(Two – tailed unpaired Student’s t – test) |
| Ctrl                                       | 0.88 | 0.07 | 5 | Ctrl vs. Mosaic    p = 0.999 (n.s.)                   |
| Mosaic                                     | 0.74 | 0.06 | 7 |                                                       |
| Power spectral density<br>(dB / Hz)<br>Amy | Mean | SEM  | N | p value<br>(Two – tailed unpaired Student’s t – test) |
| Ctrl                                       | 7.62 | 1.38 | 5 | Ctrl vs. Mosaic    p = 0.999 (n.s.)                   |
| Mosaic                                     | 7.53 | 1.45 | 7 |                                                       |
| Power spectral density<br>(dB / Hz)<br>ERC | Mean | SEM  | N | p value<br>(Two – tailed unpaired Student’s t – test) |
| Ctrl                                       | 1.85 | 0.20 | 5 | Ctrl vs. Mosaic    p = 0.981 (n.s.)                   |
| Mosaic                                     | 0.80 | 1.60 | 7 |                                                       |
| Power spectral density<br>(dB / Hz)<br>PRC | Mean | SEM  | N | p value<br>(Two – tailed unpaired Student’s t – test) |
| Ctrl                                       | 0.63 | 0.03 | 5 | Ctrl vs. Mosaic    p = 0.993 (n.s.)                   |
| Mosaic                                     | 0.41 | 0.02 | 7 |                                                       |

**Supplementary table 14. Mean values, SEM, number of samples and p values of data displayed in Supplementary Figure 9.**

| <b>Suppl. Fig. 9b</b>                        |             |            |          |                                                              |
|----------------------------------------------|-------------|------------|----------|--------------------------------------------------------------|
| <b>LFP rate<br/>(LFP / s)</b>                | <b>Mean</b> | <b>SEM</b> | <b>N</b> | <b>p value</b><br>(Two – tailed unpaired Student’s t – test) |
| Ctrl                                         | 0.253       | 0.020      | 12       | Ctrl vs. Mosaic    p = 0.305 (n.s.)                          |
| Mosaic                                       | 0.290       | 0.025      | 6        |                                                              |
| <b>LFP amplitude<br/>(<math>\mu</math>V)</b> | <b>Mean</b> | <b>SEM</b> | <b>N</b> | <b>p value</b><br>(Two – tailed unpaired Student’s t – test) |
| Ctrl                                         | 111.2       | 6.132      | 12       | Ctrl vs. Mosaic    p = 0.005 (**)                            |
| Mosaic                                       | 83.05       | 1.813      | 6        |                                                              |
| <b>LFP duration<br/>(s)</b>                  | <b>Mean</b> | <b>SEM</b> | <b>N</b> | <b>p value</b><br>(Two – tailed unpaired Student’s t – test) |
| Ctrl                                         | 0.091       | 0.013      | 12       | Ctrl vs. Mosaic    p = 0.021 (*)                             |
| Mosaic                                       | 0.042       | 0.001      | 6        |                                                              |
| <b>LFP syncro<br/>(a.u.)</b>                 | <b>Mean</b> | <b>SEM</b> | <b>N</b> | <b>p value</b><br>(Two – tailed unpaired Student’s t – test) |
| Ctrl                                         | 0.552       | 0.035      | 12       | Ctrl vs. Mosaic    p = 0.462 (n.s.)                          |
| Mosaic                                       | 0.594       | 0.035      | 6        |                                                              |

| <b>Suppl. Fig. 9c</b>                        |             |            |          |                                                              |
|----------------------------------------------|-------------|------------|----------|--------------------------------------------------------------|
| <b>LFP rate<br/>(LFP / s)</b>                | <b>Mean</b> | <b>SEM</b> | <b>N</b> | <b>p value</b><br>(Two – tailed unpaired Student’s t – test) |
| Ctrl                                         | 0.343       | 0.026      | 13       | Ctrl vs. Mosaic    p = 0.061 (n.s.)                          |
| Mosaic                                       | 0.250       | 0.030      | 8        |                                                              |
| <b>LFP amplitude<br/>(<math>\mu</math>V)</b> | <b>Mean</b> | <b>SEM</b> | <b>N</b> | <b>p value</b><br>(Two – tailed unpaired Student’s t – test) |
| Ctrl                                         | 90.06       | 3.183      | 13       | Ctrl vs. Mosaic    p = 0.120 (n.s.)                          |
| Mosaic                                       | 101.9       | 7.775      | 8        |                                                              |
| <b>LFP duration<br/>(s)</b>                  | <b>Mean</b> | <b>SEM</b> | <b>N</b> | <b>p value</b><br>(Two – tailed unpaired Student’s t – test) |
| Ctrl                                         | 0.056       | 0.008      | 13       | Ctrl vs. Mosaic    p = 0.045 (*)                             |
| Mosaic                                       | 0.101       | 0.023      | 8        |                                                              |
| <b>LFP syncro<br/>(a.u.)</b>                 | <b>Mean</b> | <b>SEM</b> | <b>N</b> | <b>p value</b><br>(Two – tailed unpaired Student’s t – test) |
| Ctrl                                         | 0.580       | 0.008      | 13       | Ctrl vs. Mosaic    p = 0.901 (n.s.)                          |
| Mosaic                                       | 0.554       | 0.029      | 8        |                                                              |

| <b>Suppl. Fig. 9d</b> |             |            |          |                |
|-----------------------|-------------|------------|----------|----------------|
| <b>LFP rate</b>       | <b>Mean</b> | <b>SEM</b> | <b>N</b> | <b>p value</b> |

| (LFP / s)                                    |             |            |          | (Two – tailed unpaired Student's t – test)                   |
|----------------------------------------------|-------------|------------|----------|--------------------------------------------------------------|
| Ctrl                                         | 0.344       | 0.042      | 5        | Ctrl vs. Mosaic    p = 0.753 (n.s.)                          |
| Mosaic                                       | 0.326       | 0.034      | 5        |                                                              |
| <b>LFP amplitude<br/>(<math>\mu</math>V)</b> | <b>Mean</b> | <b>SEM</b> | <b>N</b> | <b>p value</b><br>(Two – tailed unpaired Student's t – test) |
| Ctrl                                         | 117.8       | 15.25      | 5        | Ctrl vs. Mosaic    p = 0.100 (n.s.)                          |
| Mosaic                                       | 88.29       | 4.436      | 5        |                                                              |
| <b>LFP duration<br/>(s)</b>                  | <b>Mean</b> | <b>SEM</b> | <b>N</b> | <b>p value</b><br>(Two – tailed unpaired Student's t – test) |
| Ctrl                                         | 0.029       | 0.005      | 5        | Ctrl vs. Mosaic    p = 0.079 (n.s.)                          |
| Mosaic                                       | 0.070       | 0.019      | 5        |                                                              |
| <b>LFP syncro<br/>(a.u.)</b>                 | <b>Mean</b> | <b>SEM</b> | <b>N</b> | <b>p value</b><br>(Two – tailed unpaired Student's t – test) |
| Ctrl                                         | 0.556       | 0.008      | 5        | Ctrl vs. Mosaic    p = 0.232 (n.s.)                          |
| Mosaic                                       | 0.528       | 0.020      | 5        |                                                              |

| <b>Suppl. Fig. 9e</b>                                                         |             |            |          |                                                              |
|-------------------------------------------------------------------------------|-------------|------------|----------|--------------------------------------------------------------|
| <b>Power spectral<br/>density<br/>(dB / Hz)<br/><math>\alpha</math>-bands</b> | <b>Mean</b> | <b>SEM</b> | <b>N</b> | <b>p value</b><br>(Two – tailed unpaired Student's t – test) |
| Ctrl                                                                          | 23.60       | 2.12       | 12       | Ctrl vs. Mosaic    p < 0.05 (*)                              |
| Mosaic                                                                        | 33.67       | 1.20       | 6        |                                                              |
| <b>Power spectral<br/>density<br/>(dB / Hz)<br/><math>\beta</math>-bands</b>  | <b>Mean</b> | <b>SEM</b> | <b>N</b> | <b>p value</b><br>(Two – tailed unpaired Student's t – test) |
| Ctrl                                                                          | -1          | 2.08       | 12       | Ctrl vs. Mosaic    p < 0.001 (***)                           |
| Mosaic                                                                        | 21          | 0.57       | 6        |                                                              |
| <b>Power spectral<br/>density<br/>(dB / Hz)<br/><math>\gamma</math>-bands</b> | <b>Mean</b> | <b>SEM</b> | <b>N</b> | <b>p value</b><br>(Two – tailed unpaired Student's t – test) |
| Ctrl                                                                          | - 4.73      | 0.63       | 12       | Ctrl vs. Mosaic    p < 0.001 (***)                           |
| Mosaic                                                                        | 11          | 1.15       | 6        |                                                              |

| <b>Suppl. Fig. 9f</b>                                                         |             |            |          |                                                              |
|-------------------------------------------------------------------------------|-------------|------------|----------|--------------------------------------------------------------|
| <b>Power spectral<br/>density<br/>(dB / Hz)<br/><math>\alpha</math>-bands</b> | <b>Mean</b> | <b>SEM</b> | <b>N</b> | <b>p value</b><br>(Two – tailed unpaired Student's t – test) |

|                                                                   |             |            |          |                                                              |
|-------------------------------------------------------------------|-------------|------------|----------|--------------------------------------------------------------|
|                                                                   |             |            |          |                                                              |
| Ctrl                                                              | 21.67       | 3.71       | 13       | Ctrl vs. Mosaic $p > 0.05$ (n.s.)                            |
| Mosaic                                                            | 28          | 3.05       | 8        |                                                              |
| <b>Power spectral density (dB / Hz) <math>\beta</math>-bands</b>  | <b>Mean</b> | <b>SEM</b> | <b>N</b> | <b>p value</b><br>(Two – tailed unpaired Student's t – test) |
| Ctrl                                                              | 2.433       | 0.296      | 13       | Ctrl vs. Mosaic $p < 0.01$ (**)                              |
| Mosaic                                                            | 9.20        | 0.986      | 8        |                                                              |
| <b>Power spectral density (dB / Hz) <math>\gamma</math>-bands</b> | <b>Mean</b> | <b>SEM</b> | <b>N</b> | <b>p value</b><br>(Two – tailed unpaired Student's t – test) |
| Ctrl                                                              | 0.167       | 0.731      | 13       | Ctrl vs. Mosaic $p > 0.05$ (n.s.)                            |
| Mosaic                                                            | 0.30        | 0.87       | 8        |                                                              |

|                                                                   |             |            |          |                                                              |
|-------------------------------------------------------------------|-------------|------------|----------|--------------------------------------------------------------|
| <b>Suppl. Fig. 9g</b>                                             |             |            |          |                                                              |
| <b>Power spectral density (dB / Hz) <math>\alpha</math>-bands</b> | <b>Mean</b> | <b>SEM</b> | <b>N</b> | <b>p value</b><br>(Two – tailed unpaired Student's t – test) |
| Ctrl                                                              | 25.91       | 4.76       | 13       | Ctrl vs. Mosaic $p = 0.998$ (n.s.)                           |
| Mosaic                                                            | 25.13       | 5.11       | 8        |                                                              |
| <b>Power spectral density (dB / Hz) <math>\beta</math>-bands</b>  | <b>Mean</b> | <b>SEM</b> | <b>N</b> | <b>p value</b><br>(Two – tailed unpaired Student's t – test) |
| Ctrl                                                              | 5.45        | 2.02       | 13       | Ctrl vs. Mosaic $p < 0.001$ (***)                            |
| Mosaic                                                            | -3.84       | 1.32       | 8        |                                                              |
| <b>Power spectral density (dB / Hz) <math>\gamma</math>-bands</b> | <b>Mean</b> | <b>SEM</b> | <b>N</b> | <b>p value</b><br>(Two – tailed unpaired Student's t – test) |
| Ctrl                                                              | -4.76       | 1.45       | 13       | Ctrl vs. Mosaic $p = 0.895$ (n.s.)                           |
| Mosaic                                                            | -3.90       | 1.04       | 8        |                                                              |
